1 ***In silico* screening of GMQ-like compounds reveals guanabenz**  
2 **and sephin1 as new allosteric modulators of acid-sensing ion**  
3 **channel 3**

4

5 Gerard Callejo, Luke A. Pattison, Jack C. Greenhalgh, Sampurna Chakrabarti,  
6 Evangelia Andreopoulou, James R. F. Hockley, Ewan St. John Smith\* and Taufiq  
7 Rahman\*.

8

9 *Department of Pharmacology, University of Cambridge, Tennis Court Road,*  
10 *Cambridge CB2 1PD, UK*

11

12 *\*Corresponding authors: Ewan St. John Smith, [es336@cam.ac.uk](mailto:es336@cam.ac.uk) and Taufiq*  
13 *Rahman, [mtur2@cam.ac.uk](mailto:mtur2@cam.ac.uk).*

14

15 Keywords: acid-sensing ion channel, GMQ, Sephin1, nociception

## 16 **Abstract**

17 Acid-sensing ion channels (ASICs) are voltage-independent cation channels that  
18 detect decreases in extracellular pH. Dysregulation of ASICs underpins a number  
19 of pathologies. Of particular interest is ASIC3, which is recognised as the key  
20 sensor of acid-induced pain and is instrumental in the establishment of pain  
21 arising from inflammatory conditions, such as rheumatoid arthritis. Thus, the  
22 identification of new ASIC3 modulators and the mechanistic understanding of  
23 how these compounds modulate ASIC3 could be important for the development  
24 of new strategies to counteract the detrimental effects of dysregulated ASIC3  
25 activity in inflammation. Here, we report the identification of novel ASIC3  
26 modulators based on the ASIC3 specific agonist, 2-guanidine-4-  
27 methylquinazoline (GMQ). Through a GMQ-guided *in silico* screening of Food  
28 and Drug administration (FDA)-approved drugs, 5 compounds were selected and  
29 tested for their possible modulation of rat ASIC3 (rASIC3) using whole-cell patch-  
30 clamp electrophysiology. Of the chosen drugs, guanabenz, an  $\alpha$ 2-adrenoceptor  
31 agonist, produced similar effects to GMQ on rASIC3, activating the channel at  
32 neutral pH and potentiating its response to mild acidic stimuli. Sephin1, a  
33 guanabenz derivative that lacks  $\alpha$ 2-adrenoceptor activity, has been proposed to  
34 act as a selective inhibitor of a regulatory subunit of the stress-induced protein  
35 phosphatase 1 (PPP1R15A) with promising therapeutic potential for the  
36 treatment of multiple sclerosis. However, we found that like guanabenz, sephin1  
37 activates rASIC3 at neutral pH and potentiates its response to acidic stimulation,  
38 i.e. sephin1 is a novel modulator of rASIC3. Furthermore, docking experiments  
39 showed that, like GMQ, guanabenz and sephin1 likely interact with the nonproton  
40 ligand-sensing domain of rASIC3. Overall, these data demonstrate the utility of  
41 computational analysis for identifying novel ASIC3 modulators, which can be  
42 validated with electrophysiological analysis and may lead to the development of  
43 better compounds for targeting ASIC3 in the treatment of inflammatory  
44 conditions.

## 45 Introduction

46 Extracellular protons modulate the activity of a wide range of ion channels and  
47 receptors, which activate sensory neurons involved in nociception and the  
48 development of pain [1]. One key group of proton sensors is the acid-sensing ion  
49 channel (ASIC) family, these voltage-independent, ligand-gated cation channels  
50 are activated by extracellular protons [2–4] and belong to the amiloride-sensitive  
51 epithelial sodium channel/degenerin (ENaC/DEG) ion channel family [5,6]. In  
52 mammals, four genes (*accn1-4*) encode for at least 6 different ASIC subunits  
53 (ASIC1a, ASIC1b, ASIC2a, ASIC2b, ASIC3, ASIC4), which can assemble into  
54 homo- and heterotrimeric channels displaying different pH sensitivity, current  
55 kinetics and pharmacology [7–9]. ASICs are widely expressed in the central and  
56 peripheral nervous systems [2,10] and are implicated in a range of physiological  
57 and pathological processes including nociception, mechanosensation and  
58 learning/memory [2,5,11–13]. The involvement of ASICs in such a plethora of  
59 physiological and pathological roles makes them attractive pharmacological  
60 targets for drug development and a variety of agents have been identified that act  
61 as agonists/antagonists for these channels with differing levels of selectivity [14].  
62 Of the ASIC subunits, there is good evidence that ASIC3 is a critical acid sensor  
63 involved in acid-induced pain. ASIC3 homomers are the most sensitive to  
64 decreases in extracellular pH [7], in response to which they produce a biphasic  
65 inward current composed of a large, rapidly desensitizing transient current,  
66 followed by a smaller, non-desensitizing sustained window current (resulting from  
67 an overlap between pH-dependent activation and inactivation curves) that lasts  
68 for the duration of the acidic stimulus [15,16]. Although protons appear to be the  
69 main endogenous activators of ASICs, other molecules that modulate ASIC  
70 function have been discovered. For instance, endogenous molecules such as  
71 arachidonic acid and anandamide [17], serotonin [18], dynorphins [19] and lactate  
72 [20] all enhance ASIC3 currents in response to acidic stimulation. In addition, 2-  
73 guanidine-4-methylquinazoline (GMQ) [21], agmatine [22] and  
74 lysophosphatidylcholine [23] can activate ASIC3 at neutral pH by increasing the  
75 sustained, window current. Moreover, a range of toxins isolated from animal  
76 venoms also modulate ASIC function [24]. Among them, APETx2, a toxin isolated  
77 from the sea anemone *Anthopleura elegantissima*, inhibits the transient

78 component of ASIC3 activation in response to an acidic stimulus (pH 4) without  
79 affecting its sustained component [25] and it has been used to establish the role  
80 of ASIC3 in a number of physiological and pathological processes, including  
81 inflammatory pain [26]. Nevertheless, the relationship between ASIC3, pain and  
82 inflammation is complex. Several histological studies, as well as those employing  
83 pharmacological ASIC3 modulation, have determined an involvement of ASIC3  
84 in pain elicited in deep tissues such as joints, muscle and the viscera [27–33].  
85 However, further studies using ASIC3-deficient mice have suggested a more  
86 limited role in pain [34], as well as a proposed dual role of ASIC3 in arthritis where  
87 lack of ASIC3 ameliorates pain, but increases inflammatory processes in the  
88 arthritic joint [35]. A possible explanation of these controversial results could be  
89 that inflammatory processes are sometimes [36], but not always [37],  
90 accompanied by acidosis. Nevertheless, the complex and controversial role of  
91 ASIC3 in some inflammatory processes requires the development of better  
92 pharmacological tools to dissect its precise function in such conditions. To this  
93 end, in the present study we hypothesised that we could employ GMQ as a query  
94 structure in a ligand-based *in silico* screening of FDA-approved drugs to identify  
95 novel ASIC3 modulators. From the results of the screening, we selected five  
96 different compounds with chemical and structural similarities to GMQ. From all  
97 drugs tested, guanabenz (GBZ), an antihypertensive drug, caused an  
98 enhancement of acid-induced rASIC3 activation and, like GMQ, it also activated  
99 the channel at neutral pH. Given that GBZ is an agonist of  $\alpha$ 2-adrenoceptors [38],  
100 and with the goal of identify a more selective ASIC3 modulator, we evaluated the  
101 effect of sephin1, a GBZ derivative that has no adrenoceptor activity that may be  
102 of use in protein misfolding diseases such as multiple sclerosis [39]. Similarly to  
103 GBZ and GMQ, sephin1 was activated rASIC3 at neutral pH and potentiated its  
104 activation in response to a mild acidosis. In summary, we demonstrate that  
105 ligand-based *in silico* approaches can be useful to identify novel small molecule  
106 modulators of ASIC3. Indeed, we have identified, from a library of FDA-approved  
107 drugs that have been proven safe for their use in humans, novel ASIC3  
108 modulators that enhance rASIC3 activity, proving that this approach can serve to  
109 identify potential new ASICs modulating drugs that could be useful for treatment  
110 of inflammatory disorders.

## 111 **Materials and Methods**

### 112 **Ligand-based screening**

113 The 3D structure of GMQ was obtained from pubchem (pubchem CID: 345657)  
114 and was subsequently energy-minimised using MMFF94 force field implemented  
115 in OpenBabel version 2.4.0 [40]. Using the energy-minimised GMQ structure as  
116 a 3D query, Rapid Overlay of Chemical Structures (ROCS) (version 3.2.2.2,  
117 OpenEye Scientific Software, Santa Fe, NM) [41] was used to screen a conformer  
118 library generated from eDrug3D database [42] that contains 1884 different  
119 molecular structures including structures of enantiomers and of active  
120 metabolites of FDA-approved drugs. The conformer library was generated using  
121 Omega 3.0.1.2 (OpenEye Scientific Software) [43]. For each alignment, ROCS  
122 compares 3D shape and chemical similarity and returns a Tanimoto Combo (TC)  
123 score, ranging from 0 to 2, that includes a Shape Tanimoto (maximum 1) and  
124 Colour Tanimoto (scaled colour score, maximum 1) [44]. Following manual  
125 inspection of the top 150 hits ranked by the TC score, a subset of drugs was  
126 selected for experimental testing. Molecular field-based alignment [45] of drug  
127 structures with GMQ was performed using Forge (v 10.4.2; Cresset<sup>®</sup>, Litlington,  
128 Cambridgeshire, UK).

129

### 130 **Chinese hamster ovary cell culture and transfection**

131 Chinese hamster ovary (CHO) cells (Sigma, passage 6 to 20) were chosen for  
132 this study due to the absence of endogenous ASIC-like currents [46] and were  
133 grown using standard procedures in the following medium: Ham's F-12 Nutrient  
134 Mixture (Life Technologies), 10 % fetal bovine serum (Sigma), 1 %  
135 Penicillin/Streptomycin (100 U/ml, Life Technologies). 24-hours before  
136 transfecting cells, 35 mm dishes (Fisher) were coated with 100 µg/ml poly-L-  
137 lysine (Sigma) and cells from a 70-80% confluent flask were trypsinised,  
138 resuspended in 5 ml CHO medium and a volume was taken to seed cells at a  
139 1:10 dilution (2 ml/dish). For transfections, an EGFP expression vector was used  
140 to enable identification of transfected cells and DNA was transfected at a ratio of  
141 20:1 (rASIC3:GFP), using 1.5 µg rASIC3 DNA and 0.075 µg EGFP DNA; the  
142 transfection reagent Lipofectamine LTX (Life Technologies) was used according  
143 to the manufacturer's protocol.

144

## 145 **Whole-cell electrophysiology**

146 Whole-cell patch clamp recordings from CHO cells were performed at room  
147 temperature 24-hours after transfection. For all the experiments, the intracellular  
148 solution contained (in mM) 110 KCl, 10 NaCl, 1 MgCl<sub>2</sub>, 1 EGTA, 10 HEPES, 2  
149 Na<sub>2</sub>ATP, 0.5 Na<sub>2</sub>GTP in MilliQ water; pH was set to pH 7.3 by adding KOH and  
150 the osmolality was adjusted to 310-315 mOsm with sucrose. The extracellular  
151 solution contained (in mM) 140 NaCl, 4 KCl, 2 CaCl<sub>2</sub>, 1 MgCl<sub>2</sub>, 10 HEPES, 4  
152 Glucose in MilliQ water; osmolality was adjusted to 300-310 mOsm with sucrose  
153 and pH was adjusted to 7.4 with NaOH. Patch pipettes were pulled from glass  
154 capillaries (Hilgenberg) using a Model P-97, Flaming/Brown puller (Sutter  
155 Instruments) and had a resistance of 4-8 MΩ. Data were acquired using an  
156 EPC10 amplifier (HEKA) and Patchmaster software (HEKA) after suitable  
157 resistance compensation. To measure the effect of the different selected  
158 compounds on rASIC3 current amplitude and inactivation time constant the  
159 following protocol was used. After 5 s of pH 7.4 solution, pH 6 or pH 7 was applied  
160 for 5 s to determine the baseline rASIC3 response. Then, in the first group of  
161 experiments, a second pH 6 application was performed after 10 s of pH 7.4 and  
162 30 s of compound application to determine the effect of these compounds on  
163 rASIC3. In the second group of experiments, after the initial pH 7 baseline rASIC3  
164 response, compounds were applied at pH 7 after 30 s of pH 7.4 to measure the  
165 effect of the selected compounds on pH 7 rASIC3 activation. Finally, a third 5 s  
166 pH 6 or pH 7 application was performed after 30s of pH 7.4 solution to determine  
167 reversibility of any possible effect of the compounds on the channel. For dose-  
168 response recordings of sephin1 at neutral pH and pH 7, increasing concentrations  
169 of sephin1 were applied for 10 s with a 30 s wash period with extracellular pH 7.4  
170 solution between each application. For pH-response recordings, extracellular  
171 solutions with a pH ranging from 7.4 to 5 with/without sephin1 were applied for  
172 10 s with a 30 s wash period between applications. All compounds/acidic  
173 solutions were applied to cells through a gravity-driven 12-barrel perfusion  
174 system [47]. In all the experiments the holding potential was set at -60mV.

175

## 176 **Molecular Docking**

177 We used a homology model of rASIC3 (Uniprot accession: O35240) based on  
178 the 1.9 Å crystal structure of chicken ASIC1 homotrimer (PDB id: 2QTS; [8]) as a  
179 template. Detail of the model building was previously reported [48]. Selected  
180 drugs were docked to the rASIC3 model using the Lamarckian genetic algorithm  
181 (LGA) implemented in AutoDock 4.2.6 [49]. For all docking, an unbiased ("blind")  
182 docking approach was used where the entire rASIC3 trimer was used for  
183 generating the grid map in AutoGrid. Prior to docking, structures of all drugs  
184 (obtained from PubChem) and the rASIC3 trimer were prepared using the  
185 AutoDock Tools. Five independent docking runs were performed for each drug  
186 and the pose associated with the highest reproducibility and lowest predicted free  
187 energy of interaction ( $\Delta G$ , kcal/mol) was considered as the final pose for each  
188 drug. From the top-ranked poses of the docked drugs, the 2D ligand interaction  
189 diagrams were generated using PoseView<sup>TM</sup> implemented in the ProteinsPlus  
190 webserver (<https://proteins.plus/>). Open-Source PyMOL 1.8 (Schrodinger, LLC)  
191 was used for all molecular representations.

192

## 193 **Drugs**

194 All the small molecules used in this study were purchased from Sigma except for  
195 tizanidine (Tocris) and APETx2 (Smartox). Stock solutions were made at 100 mM  
196 for tizanidine (in H<sub>2</sub>O), guanabenz (EtOH), cycloguanil (DMSO) and sephin1  
197 (DMSO), 50 mM for GMQ (DMSO) and brimonidine (H<sub>2</sub>O), and 40 mM for  
198 guanfacine (H<sub>2</sub>O). For most experiments, compounds were diluted in pH 7.4 or  
199 pH 7 extracellular solution at 500 μM, however, GMQ, guanabenz and sephin1  
200 were diluted in extracellular pH 7.4 solution at 1 mM for one set of experiments.  
201 An APETx2 stock solution was made at 100 μM and diluted at 1 μM in pH 7.4  
202 extracellular solution.

203

## 204 **Data analysis**

205 Absolute peak amplitudes were measured by subtracting the peak amplitude  
206 response from the 5-second mean baseline prior to stimulation. Peak amplitude  
207 was then normalised by dividing the absolute peak amplitude by the capacitance  
208 of the cell to obtain peak current density (pA/pF). The inactivation time constant  
209 was measured with a single exponential equation using a built-in function of



210 Fitmaster. The sustained current to transient current ratio was calculated by  
211 measuring the size of the sustained current (peak sustained response at the end  
212 of the stimulus minus the 5-second mean baseline current) and dividing his value  
213 by the peak amplitude current ( $I_{\text{sus}}/I_{\text{peak}} \times 100$ ). The analysis of ASIC3 current  
214 amplitudes and kinetics was performed as previously reported [9]. Statistical  
215 analysis was performed in GraphPad Prism using a paired t-test comparing the  
216 baseline pH response (pA/pF) against the pH response after compound  
217 application for each cell. Data were plotted as a percentage of the initial pH  
218 response for each cell. Results are expressed as mean  $\pm$  standard error of the  
219 mean (SEM), unless otherwise stated. For dose-response curves, all  
220 measurements were expressed as a percentage of the pH baseline peak current  
221 value (pH 6 or pH 7). For pH-response curves, all measurements were  
222 transformed to percent of the maximum peak current ( $I/I_{\text{max}} \times 100$ ). The EC<sub>50</sub> for  
223 both dose- and pH-response (pH<sub>50</sub>) experiments were determined using a  
224 standard Hill equation using GraphPad Prism. For the pH-response curve in the  
225 presence of sephin1 a biphasic equation was used in GraphPad Prism. For the  
226 analysis of pH-dependent effect of sephin1 on the rASIC3 sustained current a  
227 Gaussian distribution equation was used in GraphPad Prism. All figures were  
228 made using GraphPad Prism and Adobe Illustrator CS6.



## 229 Results

### 230 Ligand-based *in silico* screening of novel ASIC3 modulators

231 Using the energy-minimised 3D structure of GMQ as a query, we used ROCS to  
232 screen a conformer library of FDA-approved drugs (eDrug3D) [42]. ROCS aligns  
233 each conformer from the target chemical library against the query or bait structure  
234 and quantifies the overall similarity between the aligned ligands as the Tanimoto  
235 Combo (TC) score. The latter is the sum of the Shape Tanimoto and the Color  
236 Tanimoto (scaled colour score), which represent the measure of similarity in 3D  
237 shape and chemical properties between the aligned moieties, respectively [44].  
238 Of the top 150 hits ranked by the TC score, we manually inspected each  
239 individual hit for the degrees of 3D shape overlap and chemical similarity with  
240 GMQ, paying particular attention to the presence of a guanidine (or similar)  
241 moiety. This finally led us to shortlist 5 drugs, namely tizanidine (TIZ), cycloguanil  
242 (CG), brimonidine (BRI), guanfacine (GF) and GBZ (Fig. 1A). Of these hits, GBZ  
243 and GF contain an explicit (i.e. free) guanidine group (shown in red in Fig.1B),  
244 whereas CG, BRI and TIZ have an 'implicit' (i.e. within a ring) guanidine moiety.

245

246 To assess how these drugs compare to GMQ in terms of overall surface  
247 electrostatics, they were aligned to the energy-minimised GMQ structure using  
248 the software Forge™ (Cresset, UK), which uses a proprietary molecular  
249 mechanics-based ('XED') forcefield to generate and compare molecular 'field  
250 points' between aligned molecules (Fig. 1B). These field points represent  
251 positions of maximum interaction of a molecule with its electrostatic, steric and  
252 hydrophobic surroundings and thus effectively provides a 'protein-centric' view of  
253 a ligand. Upon alignment, Forge produces a field similarity score that takes both  
254 volume and molecular field points into account and a field score >0.7 is often  
255 regarded as indicator of reasonably good electrostatic similarities between the  
256 query and the bait molecule [45]. GBZ both qualitatively and quantitatively has  
257 the highest field point similarity with GMQ; in decreasing order of similarity of  
258 molecular fields, compound similarity with GMQ was computed as: BRI > TIZ >  
259 GF > CG (Fig. 1B).

260

261

## 262 **Effect of selected drugs on acid-induced rASIC3 activation.**

263 The following set of experiments were conducted to determine if the selected  
264 drugs modulate rASIC3 function. We performed whole-cell patch clamp  
265 recordings in CHO cells co-transfected with rASIC3 and EGFP and evaluated the  
266 effect of 30 s application of each drug (500  $\mu$ M) on the rASIC3 response to pH 6.  
267 In this series of experiments, we also evaluated the effect of GMQ and APETx2,  
268 which were used as positive controls. As expected, in rASIC3-expressing CHO  
269 cells, APETx2 (1 $\mu$ M) application did not activate the channel at neutral pH, but  
270 produced a significant inhibition of transient ( $I_{Peak}$ , Fig. 2A-B, n = 10, paired t-test,  
271 p = 0.0013) and sustained ( $I_{5s}$ , Fig. 2A, n = 10, paired t-test, p = 0.029) current  
272 evoked by pH 6 (Table 1). However, the ratio  $I_{5s}/I_{Peak}$  was significantly increased  
273 (Fig 2C and Table 1, n = 10, paired t-test, p = 0.036), indicating that the  
274 predominant APETx2 inhibitory effect is exerted on the transient phase as  
275 previously described [25]. In addition, APETx2 significantly inhibited the  
276 inactivation time constant ( $\tau$ ) of rASIC3 (Fig. 2D and Table 1, n = 10, paired t-  
277 test, p = 0.0005). By contrast, GMQ generated a sustained inward current at pH  
278 7.4 as reported previously [21], but did not significantly modulate channel current  
279 amplitude or inactivation kinetics (Table 1).

280

281 Among the 5 drugs tested in these series of experiments (summarised in Table  
282 1), with the exception of GBZ, none of them produced a significant change on  
283 rASIC3 current amplitude or inactivation kinetics (Fig. 2B-D). Unlike all other  
284 compounds tested, and in a similar fashion to GMQ, we observed that GBZ, a  
285 drug currently used to treat hypertension, activated rASIC3 at neutral pH (Fig.  
286 2A). However, unlike GMQ, pre-application of GBZ elicited a significant increase  
287 in the transient and sustained components of the pH 6-induced rASIC3 current  
288 (Fig. 2B and Table 1,  $I_{Peak}$ , n = 11, paired t-test, p = 0.0173;  $I_{5s}$ , n = 11, paired t-  
289 test, p = 0.015). The stronger potentiating effect upon the sustained current  
290 (403%) compared with the effect on the transient current (113%) produced a  
291 significant increase in the  $I_{5s}/I_{Peak}$  ratio (Fig. 2C and Table 1, n = 11, paired t-test,  
292 p = 0.016) and the inactivation time constant of the pH 6-induced rASIC3  
293 response was significantly increased by GBZ (Fig. 2D and Table 1, n = 11, paired  
294 t-test, p = 0.014).

## 295 **Effect of GBZ on rat ASIC3 response to mild acidosis.**

296 Millimolar concentrations of GMQ are required to activate rASIC3 channels at  
297 neutral pH, but at micromolar concentrations, GMQ sensitises pH 7-induced  
298 rASIC3 channel activation [21]. At neutral pH, even though both GMQ and GBZ  
299 (1 mM), are capable of activating rASIC3, the activation of rASIC3 by GBZ is of  
300 smaller magnitude compared to GMQ-induced rASIC3 activation ( $11 \pm 1.6\%$  for  
301 GMQ vs  $5 \pm 1.1$  for GBZ, Fig.3A and 3B). Given the structural and chemical  
302 similarities between GMQ and GBZ (Fig. 1), we next tested the effect GBZ (500  
303  $\mu\text{M}$ ) on pH 7-induced rASIC3 activation to determine if, like GMQ, it also  
304 sensitises the pH 7 response of rASIC3. As expected, the application of GMQ  
305 (500  $\mu\text{M}$ ) at pH 7 elicited a significant sensitisation of rASIC3 by increasing the  
306 amplitude of both transient and sustained current components ( $I_{\text{peak}}$  pH 7:  $50 \pm$   
307  $5.9$  pA/pF vs  $I_{\text{peak}}$  pH 7 + GMQ:  $203.4 \pm 34.8$  pA/pF, paired t-test,  $n = 9$ ,  $p = 0.001$ ;  
308  $I_{5s}$ :  $13.3 \pm 1.5$  pA/pF vs  $132.5 \pm 25.4$  pA/pF, paired t-test,  $n = 9$ ,  $p = 0.0012$ , Fig.  
309 3C and 3D), and also increased the  $I_{5s}/I_{\text{peak}}$  ratio ( $I_{5s}/I_{\text{peak}}$  pH 7:  $26.8 \pm 1.2$  % vs  
310  $I_{5s}/I_{\text{peak}}$  pH 7 + GMQ:  $63.7 \pm 2$  %, paired t-test,  $n = 9$ ,  $p < 0.0001$ , Fig. 3D),  
311 suggesting a stronger effect on the sustained component of rASIC3. Similarly,  
312 GBZ (500  $\mu\text{M}$ ) potentiated the pH 7-induced rASIC3 activation ( $I_{\text{peak}}$  pH 7:  $159.3$   
313  $\pm 36$  pA/pF vs  $I_{\text{peak}}$  pH 7 + GBZ:  $418.6 \pm 103.5$  pA/pF, paired t-test,  $n = 6$ ,  $p =$   
314  $0.038$ ;  $I_{5s}$ :  $52.3 \pm 9.6$  pA/pF vs  $342.1 \pm 82.6$  pA/pF, paired t-test,  $n = 6$ ,  $p = 0.012$ ;  
315  $I_{5s}/I_{\text{peak}}$  pH 7:  $35 \pm 4.9$  % vs  $I_{5s}/I_{\text{peak}}$  pH 7 + GBZ:  $81.3 \pm 3.2$  %, paired t-test,  $n =$   
316  $6$ ,  $p = 0.012$ , Fig. 3B and 3D), suggesting a similar mechanism of rASIC3  
317 modulation. However, as observed for the activation of rASIC3 at neutral pH, the  
318 sensitising effect on the transient component of the pH 7-induced rASIC3  
319 activation by GBZ was smaller than that elicited by GMQ, although the effect of  
320 both molecules on the ratio  $I_{5s}/I_{\text{peak}}$  was of comparable magnitude ( $I_{\text{peak}}$  GMQ:  
321  $408.1 \pm 44.9$  % vs  $I_{\text{peak}}$  GBZ:  $275.4 \pm 25.3$  %;  $I_{5s}/I_{\text{peak}}$  GMQ:  $240.3 \pm 9.1$  % vs  
322  $I_{5s}/I_{\text{peak}}$  GBZ:  $259.6 \pm 42.5$  %, Fig. 3D).

323

324 The carboxyl-carboxylate interaction pair formed by the residues E79 and E423  
325 in the palm domain of rASIC3 has been implicated in GMQ binding and the cavity  
326 where these two amino acids are localised has been named the 'nonproton ligand  
327 sensor domain' because several 'nonproton' ASIC3 ligands such as GMQ,

328 agmatine and serotonin all bind this domain [18,21,22]. Although GBZ shares  
329 certain structural and chemical properties with GMQ, including a guanidine  
330 moiety (Fig. 1B), these molecules may or may not share the same binding site  
331 or manifest similar binding mode to the same site on ASIC3. To address this  
332 aspect, we performed *in silico* blind docking experiments with GMQ and GBZ  
333 against our rASIC3 homology model [48]. In this unbiased docking approach,  
334 GMQ preferentially docked to a pocket located in the palm domain of rASIC3  
335 (Fig.3E) which has been computationally and experimentally established in  
336 previous studies as the likely binding site for GMQ and designated as the  
337 nonproton ligand sensor domain [21,50]. In our hands, the guanidinium moiety of  
338 GMQ seems to form two salt bridges with E423 whilst the 4-methylquinazoline  
339 moiety makes a hydrophobic interaction with L77 and V425 (Fig. 3F).  
340 Interestingly, GBZ also docked to the same location (Fig. 3E). Whilst similar salt  
341 bridges are also retained in the best docked pose of GBZ, no comparable  
342 hydrophobic interactions were discernible with L77 and V425, presumably due to  
343 lack of an additional aromatic ring when compared to GMQ structure (Fig.3F).

344

345 Taken together, these results indicate that GBZ modulates rASIC3 in the mild  
346 acidic range and that its binding site likely overlaps with that of GMQ, the so called  
347 nonproton ligand sensor domain. However, their precise modes of binding may  
348 be different, which may underlie the different potencies observed on rASIC3  
349 current activation.

350

### 351 **The GBZ derivative, sephin1, positively modulates rASIC3**

352 Recently, it has been demonstrated that a GBZ derivative without  $\alpha$ 2-  
353 adrenoceptor activity, sephin1 (also known as IFB-088; Fig.4A) acts as an  
354 inhibitor of a regulatory subunit of the stress-induced protein phosphatase 1  
355 (PPP1R15A) [51]. Sephin1 is effectively the mono-chlorinated version of GBZ  
356 and is currently under investigation in clinical trials and hence was not included  
357 in the eDrug3D database that we initially screened with ROCS using GMQ as  
358 bait. ROCS-based alignment of sephin1 with GMQ revealed by far the highest  
359 similarity among the 5 initially selected FDA-approved compounds in terms of  
360 both 3D shape (>90%) and chemical features (>50%) with an overall TC score of

361 1.481 (Fig. 4A). In agreement with this, sephin1 appeared to be the most similar  
362 to GMQ among all FDA-approved selected drugs in terms of the molecular field  
363 points with the highest overall field score (Field Score = 0.847, Fig. 4B).

364

365 Given the high molecular similarity observed *in silico* for sephin1 and GMQ/GBZ,  
366 we evaluated the effect of sephin1 on the acid-induced rASIC3 response. Firstly,  
367 we observed that sephin1 (500  $\mu$ M) did not affect the transient component of pH  
368 6-induced rASIC3 activation, but it did induce an increase in the amplitude of the  
369 sustained component ( $I_{\text{peak}}$  pH 6:  $782.8 \pm 98.5$  pA/pF vs  $I_{\text{peak}}$  pH 6 + sephin1:  
370  $775.1 \pm 108.7$  pA/pF, paired t-test,  $n = 10$ ,  $p = 0.82$ ;  $I_{5s}$  pH 6:  $4.3 \pm 0.6$  pA/pF vs  
371  $I_{5s}$  pH 6 + sephin1:  $11.2 \pm 2.8$  pA/pF, paired t-test,  $n = 10$ ,  $p = 0.03$ , Fig. 4B and  
372 4C) without significantly affecting the  $I_{5s}/I_{\text{peak}}$  ratio ( $I_{5s}/I_{\text{peak}}$  pH 6:  $0.3 \pm 0.1$  pA/pF  
373 vs  $I_{5s}/I_{\text{peak}}$  pH 6 + sephin1:  $0.6 \pm 0.2$  pA/pF, paired t-test,  $n = 10$ ,  $p = 0.13$ ) or the  
374 inactivation time constant (Tau:  $301.4 \pm 16.5$  ms vs  $336.9 \pm 34.4$  ms, paired t-  
375 test,  $n = 10$ ,  $p = 0.09$ , Fig. 4C) . Similarly to GMQ and GBZ, both 500  $\mu$ M and 1  
376 mM sephin1 also activated rASIC3 at neutral pH (Fig. 4C and 4E insets) with an  
377  $EC_{50}$  of a similar magnitude to that described for GMQ (GMQ = 0.68 mM [21] vs.  
378 sephin1 = 0.35 mM) (Fig. 4F). Furthermore, like GMQ and GBZ, sephin1 induced  
379 a strong sensitisation, in a dose-dependent fashion, of the transient and  
380 sustained components of the pH 7-induced rASIC3 activation (Fig. 5A-D),  
381 revealing an  $EC_{50}$  of 28.93  $\mu$ M for the rASIC3 transient current at pH 7 (Fig. 5B).  
382 Given the high similarities in the action of sephin1 and GMQ, we hypothesized  
383 that sephin1 also binds to the nonproton ligand sensor domain of rASIC3.  
384 Similarly to GBZ, *in silico* blind docking experiments showed the likely interaction  
385 of sephin1 with the E423 of the nonproton ligand sensor domain, but not E79,  
386 together with possible hydrophobic interaction of the aromatic ring of sephin1 with  
387 residue A378 (Fig. 5E and 5F). We next tested the pH dependency of rASIC3  
388 modulation by sephin1. The application of different pH solutions ranging from pH  
389 7.4 to 5 (Fig. 5G and 5H) on rASIC3 induced currents of increasing magnitude to  
390 produce a sigmoidal curve that could be fitted to reveal a  $pH_{50}$  value of 6.36 (Fig.  
391 5G inset), in accordance with previous reports [7,52]. However, in the presence  
392 of sephin1 (500  $\mu$ M), rASIC3 transient activation followed a pH-dependent,  
393 biphasic curve (Fig. 5H inset), suggesting an interplay between the action of  
394 sephin1 on rASIC3 and its proton activation. As showed previously by Yu et al.

395 using GMQ [21], sephin1 activated rASIC3 at neutral pH, but also potentiated its  
396 sustained current at all pH solutions tested, showing a Gaussian distribution with  
397 a peak at pH 6.56 ( $r^2 = 0.43$ , Fig. 5I). Altogether, these results show that sephin1  
398 modulates rASIC3 activation possibly through interacting with the nonproton  
399 ligand sensor domain of the channel.



## 400 Discussion

401 The ASIC family of ion channels have been implicated in many physiological and  
402 pathological processes including nociception [53–55], where they have been  
403 established as attractive pharmacological targets for treating pain. ASIC3 is  
404 considered of particular interest given its high expression in primary sensory  
405 neurones [10] and its involvement in inflammatory pain originating from different  
406 tissues including muscle, joints and skin [26–28,56–58]. Therefore, the  
407 exploration of novel ASIC3 modulators could increase our knowledge of ion  
408 channel function and also be pivotal for the development of new strategies to  
409 counteract the detrimental effects of dysregulated ASIC3 activity in  
410 pathophysiological states. Many molecules that modulate ASIC3 function have  
411 been discovered, ranging from non-selective ASIC3 blockers such as amiloride  
412 that acts as a pore blocker and paradoxically stimulates ASIC3 at neutral pH [3],  
413 to more specific molecules, such as the inhibitory toxin APETx2, which inhibits  
414 the acid-induced transient ASIC3 current [25], and the selective agonist GMQ,  
415 which activates ASIC3 at neutral pH and potentiates its activation in response to  
416 an acidic stimulus through the nonproton ligand sensor domain of ASIC3 [21,61].  
417 In the present study, we used a ligand-based *in silico* screening of FDA-approved  
418 drugs to identify novel rASIC3 modulators. Of the top 150 hits ranked by TC  
419 score, we selected 5 different drugs with the highest structural and chemical  
420 resemblance to GMQ (Fig. 1A), including the presence of a guanidine group.  
421 Using an independent algorithm implemented in Cresset's Forge™, we then  
422 aligned these 5 drugs with GMQ and compared their surface electrostatic  
423 properties represented by the molecular field points. Of the selected drugs, GBZ  
424 showed a striking resemblance to GMQ with regard to surface electrostatics and  
425 this was reflected in the highest observed value for the field score (0.80). Of the  
426 remaining 4 drugs, only BRI which had the 2<sup>nd</sup> best field score, showed some  
427 degree of electrostatic similarity with GMQ (Fig.1B).

428

429 We next sought to experimentally evaluate the effects of these drugs on acid-  
430 induced rASIC3 activation. Only one of the drugs tested showed a modulatory  
431 effect on rASIC3 acid response to pH 6, namely GBZ, an  $\alpha$ 2-adrenoceptor  
432 agonist. When compared to GMQ, GBZ exhibited a high TC score (1.086) (Fig.



433 1B) and the highest molecular field score (0.8) among the FDA-approved drugs  
434 selected (Fig. 1), together with the presence of an explicit guanidine group.  
435 Interestingly, TIZ and BRI that showed a higher TC score (Fig. 1A; 1.047 and  
436 1.161, respectively) than GBZ and a lower field score in terms of surface  
437 electrostatics but the presence of an implicit guanidine moiety (Fig. 1B), did not  
438 modulate rASIC3 function, suggesting that a combination of structural and  
439 chemical similarities with GMQ and the presence of an explicit guanidine group  
440 are required to modulate ASIC3. Nevertheless, it was perhaps unsurprising to  
441 observe that GBZ followed a similar mode of action to GMQ, being capable of  
442 activating rASIC3 at neutral pH (Fig. 2A and 3A) and inducing a non-desensitising  
443 inward current, however its potency was lower than that described for GMQ.  
444 Based on our findings from the blind docking experiments against the rASIC3  
445 homology model (Fig. 3E), this difference could be explained by the lack of  
446 interaction with the core residue L77 and the adjacent residue V425. Such  
447 interactions are observed for GMQ in our docking experiment (Fig. 3F) and have  
448 been previously shown to be important in the interaction of the 4-  
449 methylquinazoline moiety of GMQ [61]. This is plausible because, unlike GMQ,  
450 GBZ lacks a second aromatic moiety in an appropriate position to allow such  
451 hydrophobic contacts. Moreover, the sensitisation of the pH 6-induced rASIC3  
452 activation observed by GBZ (Fig. 2A and 2B) suggests a more pronounced effect  
453 of the drug in channel opening and desensitisation in response to low acidic  
454 stimulus, contrary to the more dominant effect of protons in the GMQ sensitisation  
455 at lower pH [21].

456

457 GBZ is an orally active  $\alpha$ 2-adrenoceptor agonist that has been used for many  
458 years as an antihypertensive drug [62]. However, GBZ also binds to the  
459 regulatory subunit of protein phosphatase 1, PPP1R15A, disrupting the stress-  
460 induced dephosphorylation of the  $\alpha$  subunit of the translation initiation factor 2  
461 (eIF2 $\alpha$ ), which protects against the detrimental accumulation of misfolded  
462 proteins in the endoplasmic reticulum (ER) [63] and has been proven effective in  
463 animal models that mimic misfolding protein diseases such as multiple sclerosis  
464 [64]. A recent study has identified a mono-chlorinated version of GBZ, sephin1,  
465 which retains the GBZ PPP1R15A inhibition activity, but without adrenoceptor  
466 activity [51] and it has also been shown to be effective in animal models of

467 amyotrophic lateral sclerosis [51], Charcot-Marie-Tooth 1B (CMT1B) neuropathy  
468 [51] and multiple sclerosis [39]. Given the efficacy of sephin1 to ameliorate the  
469 pathogenesis of misfolding protein diseases, InFlectis Bioscience has begun the  
470 Phase I clinical trials to evaluate the safety of sephin1 (IFB-088) with the aim of  
471 evaluating its effect on the treatment of Charcot-Marie-Tooth 1B (CMT1B)  
472 disorder.

473

474 As a result of the similar pharmacological profile of GBZ to GMQ and with the  
475 intention of identifying a more selective rASIC3 modulator without adrenoceptor  
476 activity, we tested the effect of sephin1 on acid-induced rASIC3 activation. We  
477 observed that sephin1 shared a similar pharmacological profile with GBZ and  
478 GMQ, sensitising the response (sustained component) of rASIC3 to low pH (pH  
479 6) (Fig. 4C and 4D) and mild acidosis (pH 7) (Fig. 5A-D), and activating rASIC3  
480 at neutral pH (Fig.4E). These results were consistent with our expectations given  
481 that sephin1 appeared to be most similar to GMQ in terms of structural and  
482 chemical properties, exhibiting the highest TC score (Fig. 4A), and in terms of  
483 molecular field points with the highest overall field score (Fig. 4B). Moreover,  
484 increasing concentrations of sephin1 induced increasing potentiation of the pH 7-  
485 induced rASIC3 activation (Fig. 5A). Our docking experiments indicated that  
486 sephin1 is likely to bind to the nonproton ligand sensor domain and, as we  
487 observed for GMQ and GBZ, the negatively charged residue E423 is likely to  
488 interact with the explicit guanidinium group of sephin1 (Fig. 5E and 5F). However,  
489 compared to GBZ, sephin1's lack of a chloride atom in the aromatic ring seems  
490 to allow it to make hydrophobic interactions with surrounding residues like A378,  
491 but not with L77 and Val425 as observed for GMQ (Fig.3F). Overall, these  
492 interactions likely underlie differential recognition of sephin1 at the nonproton  
493 ligand sensor domain of ASIC3, compared to that of GMQ and GBZ.

494

495 Sephin1 is able to selectively disrupt the PPP1R15A-PP1c complex at 50  $\mu$ M in  
496 cells *in vitro* and after oral administration, sephin1 accumulates in the nervous  
497 system reaching concentrations of up to 1  $\mu$ M in the brain and sciatic nerve [51].  
498 Moreover, a 2-week treatment with sephin1 at 100 nM has shown efficacy in  
499 rescuing myelination of the dorsal root ganglia in a mouse model that mimics  
500 Charcot-Marie-Tooth 1B (CMT1B) in humans. Given the high functional

501 expression of rASIC3 in DRG neurones and its involvement in pain derived from  
502 inflammatory diseases, together with the action of sephin1 observed on the  
503 channel, it is possible that sephin1 treatment could induce and/or exacerbate pain  
504 due to the activation of ASIC3 in DRG neurones, however our results show that  
505 both activation of rASIC3 at neutral pH and potentiation of the response to mild  
506 acidosis (pH 7) require higher concentrations of sephin1 (Fig. 4F and 5A) than  
507 those observed to be beneficial in treating misfolding protein diseases in mice.  
508 However, the possible additive effects of ASIC3 activated by sephin1 and other  
509 endogenous molecules found in the inflammatory soup such as arachidonic acid,  
510 which also potentiates acid-induced response of ASIC3 [17] cannot be excluded.  
511 Moreover, ASICs function as trimers, displaying different pharmacological  
512 profiles depending upon subunit composition. In the present study, we have not  
513 evaluated the effect of sephin1 in heteromeric ASIC3-containing channels or  
514 other homomeric ASIC channels, and therefore, we cannot hypothesise what  
515 might be the potential effects of sephin1 *in vivo*. For instance, GMQ modulates  
516 ASIC1a and ASIC1b by shifting their pH dependence of activation to more acidic  
517 values [60], precisely the opposite effect seen for ASIC3, effect attributed to  
518 structural differences in the extracellular domain of ASIC1a/b and ASIC3 [65].  
519 Given the pharmacological and structural resemblance of sephin1 to GMQ, it is  
520 possible that sephin1 induces similar modulatory effects on other ASIC subunits.  
521 Nevertheless, we believe that the evaluation of pain thresholds in mice and  
522 humans used to study the effect of sephin1 in misfolding protein disease should  
523 be considered in future studies.

524

525 In summary, we have identified new rASIC3 modulators using a ligand-based *in*  
526 *silico* approach, namely GBZ and sephin1, and evaluated their effect on rASIC3  
527 function using electrophysiology. Here we provide proof of principle, using a size-  
528 restricted chemical library (i.e. FDA-approved drug library), but believe this  
529 approach can be exploited in the future to screen much larger chemical space,  
530 enabling the identification of novel chemical scaffolds that act as ASIC  
531 modulators.

## 532 **Acknowledgements**

533 The authors declare no competing financial interests. This work was supported  
534 by Versus Arthritis Research Grants (RG20930 and RG21973; GC and EStJS),  
535 BBSRC grant (BB/R006210/1; JRFH and EStJS), BBSRC-funded studentships  
536 (LAP and JCG, BB/M011194/1) and Gates Cambridge Trust (SC). TR gratefully  
537 acknowledges OpenEye Scientific Software and Cresset for granting academic  
538 licenses for some software used in the present study.

539

## 540 **Author Contributions**

541 GC designed the research, conducted the experiments, acquired and analysed  
542 the data and wrote the manuscript. LAP, JCG, SC, EA and JRFH acquired and  
543 analysed the data. TR and EStJS designed the research and wrote the  
544 manuscript. All authors approved the final version of the manuscript.

545

## 546 **Declaration of Conflicting Interests**

547 The authors have no conflicting interests to declare.

## 548 **References**

549

550 [1] L.A. Pattison, G. Callejo, E. St John Smith, Evolution of acid nociception:  
551 ion channels and receptors for detecting acid, *Philos. Trans. R. Soc. B.* In  
552 press (2019).

553 [2] S. Kellenberger, L. Schild, International Union of Basic and Clinical  
554 Pharmacology. XCI. Structure, Function, and Pharmacology of Acid-  
555 Sensing Ion Channels and the Epithelial Na<sup>+</sup> Channel., *Pharmacol. Rev.*  
556 67 (2015) 1–35. doi:10.1124/pr.114.009225.

557 [3] R. Waldmann, G. Champigny, F. Bassilana, C. Heurteaux, M. Lazdunski,  
558 A proton-gated cation channel involved in acid-sensing, *Nature.* 386 (1997)  
559 173–177.

560 [4] S. Gründer, M. Pusch, Biophysical properties of acid-sensing ion channels  
561 (ASICs), *Neuropharmacology.* 94 (2015) 9–18.  
562 doi:10.1016/j.neuropharm.2014.12.016.

563 [5] E. Deval, E. Lingueglia, Acid-Sensing Ion Channels and nociception in the  
564 peripheral and central nervous systems, *Neuropharmacology.* 94 (2015)  
565 49–57. doi:10.1016/j.neuropharm.2015.02.009.

566 [6] S. Gründer, M. Pusch, Neuropharmacology Biophysical properties of acid-  
567 sensing ion channels ( ASICs ), *Neuropharmacology.* (2015) 1–10.  
568 doi:10.1016/j.neuropharm.2014.12.016.

569 [7] M. Hesselager, pH Dependency and Desensitization Kinetics of  
570 Heterologously Expressed Combinations of Acid-sensing Ion Channel  
571 Subunits, *J. Biol. Chem.* 279 (2004) 11006–11015.

572 [8] J. Jasti, H. Furukawa, E.B. Gonzales, E. Gouaux, Structure of acid-sensing  
573 ion channel 1 at 1.9 Å resolution and low pH., *Nature.* 449 (2007) 316–23.  
574 doi:10.1038/nature06163.

575 [9] L.-N. Schuhmacher, G. Callejo, S. Srivats, E.S.J. Smith, Naked mole-rat  
576 acid-sensing ion channel 3 forms nonfunctional homomers, but functional  
577 heteromers, *J. Biol. Chem.* 1 (2017) jbc.M117.807859.  
578 doi:10.1074/jbc.M117.807859.

579 [10] L.-N. Schuhmacher, E.S.J. Smith, Expression of acid-sensing ion channels  
580 and selection of reference genes in mouse and naked mole rat, *Mol. Brain.*  
581 9 (2016) 97. doi:10.1186/s13041-016-0279-2.

- 582 [11] E. Boscardin, O. Alijevic, E. Hummler, S. Frateschi, S. Kellenberger, The  
583 function and regulation of acid-sensing ion channels (ASICs) and the  
584 epithelial Na<sup>+</sup>channel (ENaC): IUPHAR Review 19, Br. J. Pharmacol.  
585 (2016) 2671–2701. doi:10.1111/bph.13533.
- 586 [12] D. Omerbašić, L.-N. Schuhmacher, Y.-A. Bernal Sierra, E.S.J. Smith, G.R.  
587 Lewin, ASICs and mammalian mechanoreceptor function.,  
588 Neuropharmacology. (2014) 1–7. doi:10.1016/j.neuropharm.2014.12.007.
- 589 [13] G. Callejo, A. Castellanos, M. Castany, A. Gual, C. Luna, M.C. Acosta, J.  
590 Gallar, J.P. Giblin, X. Gasull, Acid-sensing ion channels detect moderate  
591 acidifications to induce ocular pain, Pain. 156 (2015) 483–495.  
592 doi:10.1097/01.j.pain.0000460335.49525.17.
- 593 [14] A. Baron, E. Lingueglia, Pharmacology of acid-sensing ion channels -  
594 Physiological and therapeutical perspectives., Neuropharmacology. (2015)  
595 1–17. doi:10.1016/j.neuropharm.2015.01.005.
- 596 [15] R. Waldmann, F. Bassilana, J. de Weille, G. Champigny, C. Heurteaux, M.  
597 Lazdunski, Molecular Cloning of a Non-inactivating Proton-gated Na<sup>+</sup>  
598 Channel Specific for Sensory Neurons, J. Biol. Chem. 272 (1997) 20975–  
599 20978. doi:10.1074/jbc.272.34.20975.
- 600 [16] J. Yagi, H.N. Wenk, L. a Naves, E.W. McCleskey, Sustained currents  
601 through ASIC3 ion channels at the modest pH changes that occur during  
602 myocardial ischemia., Circ. Res. 99 (2006) 501–9.  
603 doi:10.1161/01.RES.0000238388.79295.4c.
- 604 [17] E.S. Smith, H. Cadiou, P. a. McNaughton, Arachidonic acid potentiates  
605 acid-sensing ion channels in rat sensory neurons by a direct action,  
606 Neuroscience. 145 (2007) 686–698.  
607 doi:10.1016/j.neuroscience.2006.12.024.
- 608 [18] X. Wang, W.-G. Li, Y. Yu, X. Xiao, J. Cheng, W.-Z. Zeng, Z. Peng, M. Xi  
609 Zhu, T.-L. Xu, Serotonin facilitates peripheral pain sensitivity in a manner  
610 that depends on the nonproton ligand sensing domain of ASIC3 channel.,  
611 J. Neurosci. 33 (2013) 4265–79. doi:10.1523/JNEUROSCI.3376-12.2013.
- 612 [19] T.W. Sherwood, C.C. Askwith, Dynorphin opioid peptides enhance acid-  
613 sensing ion channel 1a activity and acidosis-induced neuronal death., J.  
614 Neurosci. 29 (2009) 14371–80. doi:10.1523/JNEUROSCI.2186-09.2009.
- 615 [20] D.C. Immke, E.W. McCleskey, Lactate enhances the acid-sensing Na<sup>+</sup>



- 616 channel on ischemia-sensing neurons., *Nat. Neurosci.* 4 (2001) 869–70.  
617 doi:10.1038/nn0901-869.
- 618 [21] Y. Yu, Z. Chen, W.-G. Li, H. Cao, E.-G. Feng, F. Yu, H. Liu, H. Jiang, T.-L.  
619 Xu, A nonproton ligand sensor in the acid-sensing ion channel., *Neuron.* 68  
620 (2010) 61–72. doi:10.1016/j.neuron.2010.09.001.
- 621 [22] W.-G. Li, Y. Yu, Z.-D. Zhang, H. Cao, T.-L. Xu, ASIC3 channels integrate  
622 agmatine and multiple inflammatory signals through the nonproton ligand  
623 sensing domain., *Mol. Pain.* 6 (2010) 88. doi:10.1186/1744-8069-6-88.
- 624 [23] S. Marra, R. Ferru-clément, V. Breuil, A. Delaunay, M. Christin, V. Friend,  
625 S. Sebille, C. Cognard, T. Ferreira, C. Roux, L. Euler-ziegler, J. Noel, E.  
626 Lingueglia, E. Deval, Non-acidic activation of pain-related Acid-Sensing Ion  
627 Channel 3 by lipids, *EMBO J.* 35 (2016) 1–15.  
628 doi:10.15252/embj.201592335.
- 629 [24] B. Cristofori-Armstrong, L.D. Rash, Acid-sensing ion channel (ASIC)  
630 structure and function: Insights from spider, snake and sea anemone  
631 venoms, *Neuropharmacology.* 127 (2017) 173–184.  
632 doi:10.1016/j.neuropharm.2017.04.042.
- 633 [25] S. Diochot, A. Baron, L.D. Rash, E. Deval, P. Escoubas, S. Scarzello, M.  
634 Salinas, M. Lazdunski, A new sea anemone peptide, APETx2, inhibits  
635 ASIC3, a major acid-sensitive channel in sensory neurons., *EMBO J.* 23  
636 (2004) 1516–25. doi:10.1038/sj.emboj.7600177.
- 637 [26] E. Deval, J. Noël, N. Lay, A. Alloui, S. Diochot, V. Friend, M. Jodar, M.  
638 Lazdunski, E. Lingueglia, ASIC3, a sensor of acidic and primary  
639 inflammatory pain, *EMBO J.* 27 (2008) 3047–3055.
- 640 [27] W.S. Hsieh, C.C. Kung, S.L. Huang, S.C. Lin, W.H. Sun, TDAG8, TRPV1,  
641 and ASIC3 involved in establishing hyperalgesic priming in experimental  
642 rheumatoid arthritis, *Sci. Rep.* 7 (2017) 1–14. doi:10.1038/s41598-017-  
643 09200-6.
- 644 [28] M. Ikeuchi, S.J. Kolker, L.A. Burnes, R.Y. Walder, K.A. Sluka, Role of  
645 ASIC3 in the primary and secondary hyperalgesia produced by joint  
646 inflammation in mice., *Pain.* 137 (2008) 662–9.  
647 doi:10.1016/j.pain.2008.01.020.
- 648 [29] M. Ikeuchi, S.J. Kolker, K.A. Sluka, Acid-sensing ion channel 3 expression  
649 in mouse knee joint afferents and effects of carrageenan-induced arthritis.,



- 650 J. Pain. 10 (2009) 336–42. doi:10.1016/j.jpain.2008.10.010.
- 651 [30] M. Izumi, M. Ikeuchi, Q. Ji, T. Tani, Local ASIC3 modulates pain and  
652 disease progression in a rat model of osteoarthritis., J. Biomed. Sci. 19  
653 (2012) 77. doi:10.1186/1423-0127-19-77.
- 654 [31] R.C.W. Jones, E. Otsuka, E. Wagstrom, C.S. Jensen, M.P. Price, G.F.  
655 Gebhart, Short-term sensitization of colon mechanoreceptors is associated  
656 with long-term hypersensitivity to colon distention in the mouse.,  
657 Gastroenterology. 133 (2007) 184–94. doi:10.1053/j.gastro.2007.04.042.
- 658 [32] C. Reimers, C.-H. Lee, H. Kalbacher, Y. Tian, C.-H. Hung, A. Schmidt, L.  
659 Prokop, S. Kaufenstein, D. Mebs, C.-C. Chen, S. Grunder, Identification of  
660 a cono- $\alpha$ -RFamide from the venom of *Conus textile* that targets ASIC3  
661 and enhances muscle pain., Proc. Natl. Acad. Sci. U. S. A. 114 (2017)  
662 E3507–E3515. doi:10.1073/pnas.1616232114.
- 663 [33] K.A. Sluka, R. Radhakrishnan, C.J. Benson, J.O. Eshcol, M.P. Price, K.  
664 Babinski, K.M. Audette, D.C. Yeomans, S.P. Wilson, ASIC3 in muscle  
665 mediates mechanical, but not heat, hyperalgesia associated with muscle  
666 inflammation, Pain. 129 (2007) 102–112.
- 667 [34] A.A. Staniland, S.B. McMahon, Mice lacking acid-sensing ion channels  
668 (ASIC) 1 or 2, but not ASIC3, show increased pain behaviour in the formalin  
669 test., Eur. J. Pain. 13 (2009) 554–63. doi:10.1016/j.ejpain.2008.07.001.
- 670 [35] K. a Sluka, L. a Rasmussen, M.M. Edgar, J.M. O'Donnell, R.Y. Walder, S.J.  
671 Kolker, D.L. Boyle, G.S. Firestein, Acid-sensing ion channel 3 deficiency  
672 increases inflammation but decreases pain behavior in murine arthritis.,  
673 Arthritis Rheum. 65 (2013) 1194–202. doi:10.1002/art.37862.
- 674 [36] D.J. Scholz, M.A. Janich, U. Kollisch, R.F. Schulte, J.H. Ardenkjaer-Larsen,  
675 A. Frank, A. Haase, M. Schwaiger, M.I. Menzel, Quantified pH imaging with  
676 hyperpolarized  $^{13}\text{C}$ -bicarbonate., Magn. Reson. Med. 73 (2015) 2274–  
677 2282. doi:10.1002/mrm.25357.
- 678 [37] A.J. Wright, Z.M.A. Husson, D.-E. Hu, G. Callejo, K.M. Brindle, E.S.J.  
679 Smith, Increased hyperpolarized  $^{13}\text{C}$  lactate production in a model of  
680 joint inflammation is not accompanied by tissue acidosis as assessed using  
681 hyperpolarized  $^{13}\text{C}$ -labelled bicarbonate., NMR Biomed. 31 (2018)  
682 e3892. doi:10.1002/nbm.3892.
- 683 [38] F.S.J. Tennant, R.A. Rawson, Guanabenz acetate: a new, long-acting

- 684 alpha-two adrenergic agonist for opioid withdrawal., NIDA Res. Monogr. 49  
685 (1984) 338–343.
- 686 [39] Y. Chen, J.R. Podojil, R.B. Kunjamma, J. Jones, M. Weiner, W. Lin, S.D.  
687 Miller, B. Popko, Sefin1, which prolongs the integrated stress response,  
688 is a promising therapeutic for multiple sclerosis., Brain. 142 (2019) 344–  
689 361. doi:10.1093/brain/awy322.
- 690 [40] N.M. O’Boyle, M. Banck, C.A. James, C. Morley, T. Vandermeersch, G.R.  
691 Hutchison, Open {Babel}: {An} open chemical toolbox., J. Cheminform. 3  
692 (2011) 33. doi:10.1186/1758-2946-3-33.
- 693 [41] P.C.D. Hawkins, A.G. Skillman, A. Nicholls, Comparison of shape-  
694 matching and docking as virtual screening tools., J. Med. Chem. 50 (2007)  
695 74–82. doi:10.1021/jm0603365.
- 696 [42] E. Pihan, L. Colliandre, J.-F. Guichou, D. Douguet, e-{Drug}3D: 3D  
697 structure collections dedicated to drug repurposing and fragment-based  
698 drug design., Bioinformatics. 28 (2012) 1540–1541.  
699 doi:10.1093/bioinformatics/bts186.
- 700 [43] P.C.D. Hawkins, A.G. Skillman, G.L. Warren, B.A. Ellingson, M.T. Stahl,  
701 Conformer generation with {OMEGA}: algorithm and validation using high  
702 quality structures from the {Protein} {Databank} and {Cambridge}  
703 {Structural} {Database}., J. Chem. Inf. Model. 50 (2010) 572–584.  
704 doi:10.1021/ci100031x.
- 705 [44] E. Naylor, A. Arredouani, S.R. Vasudevan, A.M. Lewis, R. Parkesh, A.  
706 Mizote, D. Rosen, J.M. Thomas, M. Izumi, A. Ganesan, A. Galione, G.C.  
707 Churchill, Identification of a chemical probe for {NAADP} by virtual  
708 screening., Nat. Chem. Biol. 5 (2009) 220–226. doi:10.1038/nchembio.150.
- 709 [45] T. Cheeseright, M. Mackey, S. Rose, A. Vinter, Molecular field extrema as  
710 descriptors of biological activity: definition and validation., J. Chem. Inf.  
711 Model. 46 (2006) 665–676. doi:10.1021/ci050357s.
- 712 [46] E.S.J. Smith, X. Zhang, H. Cadiou, P.A. McNaughton, Proton binding sites  
713 involved in the activation of acid-sensing ion channel ASIC2a, Neurosci.  
714 Lett. 426 (2007) 12–17.
- 715 [47] I. Dittert, J. Benedikt, L. Vyklický, K. Zimmermann, P.W. Reeh, V. Vlachová,  
716 Improved superfusion technique for rapid cooling or heating of cultured  
717 cells under patch-clamp conditions, J. Neurosci. Methods. 151 (2006) 178–

- 718 185. doi:10.1016/j.jneumeth.2005.07.005.
- 719 [48] T. Rahman, E.S.J. Smith, In silico assessment of interaction of sea  
720 anemone toxin APETx2 and acid sensing ion channel 3., *Biochem.*  
721 *Biophys. Res. Commun.* 450 (2014) 384–9.  
722 doi:10.1016/j.bbrc.2014.05.130.
- 723 [49] G.M. Morris, R. Huey, W. Lindstrom, M.F. Sanner, R.K. Belew, D.S.  
724 Goodsell, A.J. Olson, {AutoDock}4 and {AutoDockTools}4: {Automated}  
725 docking with selective receptor flexibility., *J. Comput. Chem.* 30 (2009)  
726 2785–2791. doi:10.1002/jcc.21256.
- 727 [50] Y. Yu, W.-G. Li, Z. Chen, H. Cao, H. Yang, H. Jiang, T.-L. Xu, Atomic level  
728 characterization of the nonproton ligand-sensing domain of ASIC3  
729 channels., *J. Biol. Chem.* 286 (2011) 24996–5006.  
730 doi:10.1074/jbc.M111.239558.
- 731 [51] I. Das, A. Krzyzosiak, K. Schneider, L. Wrabetz, M. D’Antonio, N. Barry, A.  
732 Sigurdardottir, A. Bertolotti, Preventing proteostasis diseases by selective  
733 inhibition of a phosphatase regulatory subunit, *Science* (80-. ). 348 (2015)  
734 239–242. doi:10.1126/science.aaa4484.
- 735 [52] L.-N. Schuhmacher, G. Callejo, S. Srivats, E.S.J. Smith, Naked mole-rat  
736 acid-sensing ion channel 3 forms nonfunctional homomers, but functional  
737 heteromers., *J. Biol. Chem.* 293 (2018) 1756–1766.  
738 doi:10.1074/jbc.M117.807859.
- 739 [53] E. Deval, J. Noël, X. Gasull, A. Delaunay, A. Alloui, V. Friend, A. Eschalier,  
740 M. Lazdunski, E. Lingueglia, Acid-sensing ion channels in postoperative  
741 pain, *J. Neurosci.* 31 (2011) 6059–6066.
- 742 [54] J.-H. Lin, C.-H. Hung, D.-S. Han, S.-T. Chen, C.-H. Lee, W.-Z. Sun, C.-C.  
743 Chen, Sensing acidosis: nociception or sngception?, *J. Biomed. Sci.* 25  
744 (2018) 85. doi:10.1186/s12929-018-0486-5.
- 745 [55] M. Mazzuca, C. Heurteaux, A. Alloui, S. Diochot, A. Baron, N. Voilley, N.  
746 Blondeau, P. Escoubas, A. Gélot, A. Cupo, A. Zimmer, A.M. Zimmer, A.  
747 Eschalier, M. Lazdunski, A tarantula peptide against pain via ASIC1a  
748 channels and opioid mechanisms, *Nat. Neurosci.* 10 (2007) 943–945.
- 749 [56] C.-C. Chen, A. Zimmer, W.-H. Sun, J. Hall, M.J. Brownstein, A. Zimmer, A  
750 role for ASIC3 in the modulation of high-intensity pain stimuli., *Proc. Natl.*  
751 *Acad. Sci. U. S. A.* 99 (2002) 8992–7. doi:10.1073/pnas.122245999.

- 752 [57] W.-N. Chen, C.-C. Chen, Acid mediates a prolonged antinociception via  
753 substance P signaling in acid-induced chronic widespread pain., *Mol. Pain.*  
754 10 (2014) 30. doi:10.1186/1744-8069-10-30.
- 755 [58] J. Karczewski, R.H. Spencer, V.M. Garsky, A. Liang, M.D. Leitl, M.J. Cato,  
756 S.P. Cook, S. Kane, M.O. Urban, Reversal of acid-induced and  
757 inflammatory pain by the selective ASIC3 inhibitor, APETx2., *Br. J.*  
758 *Pharmacol.* 161 (2010) 950–60. doi:10.1111/j.1476-5381.2010.00918.x.
- 759 [59] W.-G. Li, Y. Yu, C. Huang, H. Cao, T.-L. Xu, The nonproton ligand sensing  
760 domain is required for paradoxical stimulation of ASIC3 channels by  
761 amiloride, *J. Biol. Chem.* (2011).
- 762 [60] O. Alijevic, S. Kellenberger, Subtype-specific modulation of acid-sensing  
763 ion channel (ASIC) function by 2-guanidine-4-methylquinazoline., *J. Biol.*  
764 *Chem.* 287 (2012) 36059–70. doi:10.1074/jbc.M112.360487.
- 765 [61] Y. Yu, W.-G. Li, Z. Chen, H. Cao, H. Yang, H. Jiang, T.-L. Xu, Atomic level  
766 characterization of the nonproton ligand-sensing domain of ASIC3  
767 channels., *J. Biol. Chem.* 286 (2011) 24996–5006.  
768 doi:10.1074/jbc.M111.239558.
- 769 [62] B. Holmes, R.N. Brogden, R.C. Heel, T.M. Speight, G.S. Avery,  
770 Guanabenz. {A} review of its pharmacodynamic properties and therapeutic  
771 efficacy in hypertension., *Drugs.* 26 (1983) 212–229.
- 772 [63] P. Tsaytler, H.P. Harding, D. Ron, A. Bertolotti, Selective inhibition of a  
773 regulatory subunit of protein phosphatase 1 restores proteostasis, *Science*  
774 (80-. ). 332 (2011) 91–94. doi:10.1126/science.1201396.
- 775 [64] S.W. Way, J.R. Podojil, B.L. Clayton, A. Zaremba, T.L. Collins, R.B.  
776 Kunjamma, A.P. Robinson, P. Brugarolas, R.H. Miller, S.D. Miller, B.  
777 Popko, Pharmaceutical integrated stress response enhancement protects  
778 oligodendrocytes and provides a potential multiple sclerosis therapeutic.,  
779 *Nat. Commun.* 6 (2015) 6532. doi:10.1038/ncomms7532.
- 780 [65] T. Besson, E. Lingueglia, M. Salinas, Pharmacological modulation of Acid-  
781 Sensing Ion Channels 1a and 3 by amiloride and 2-guanidine-4-  
782 methylquinazoline (GMQ), *Neuropharmacology.* 125 (2017) 429–440.  
783 doi:10.1016/j.neuropharm.2017.08.004.
- 784

785 **Table 1**

786

|                                | $I_{Peak}$ (pA/pF) |                  | $I_{5s}$ (pA/pF) |                 | $I_{5s}/I_{Peak}$ (%) |                 | Tau (ms)       |                   |
|--------------------------------|--------------------|------------------|------------------|-----------------|-----------------------|-----------------|----------------|-------------------|
|                                | Baseline           | Compound effect  | Baseline         | Compound effect | Baseline              | Compound effect | Baseline       | Compound effect   |
| <b>APETx2</b><br>(n = 10)      | 895.55 ± 160.39    | 301.01 ± 48.83** | 5.76 ± 1.17      | 3.52 ± 0.77*    | 0.92 ± 0.34           | 1.53 ± 0.54*    | 303.12 ± 14.55 | 243.82 ± 10.06*** |
| <b>GMQ</b><br>(n = 8)          | 747.04 ± 107.29    | 746.18 ± 118.3   | 2.74 ± 0.36      | 2.9 ± 0.29      | 0.40 ± 0.06           | 0.47 ± 0.09     | 307.2 ± 16.01  | 307.36 ± 23.19    |
| <b>Tizanidine</b><br>(n = 10)  | 806.1 ± 44.39      | 866.66 ± 68.76   | 8.65 ± 1.19      | 9.25 ± 1.2      | 1.09 ± 0.14           | 1.14 ± 0.2      | 311.15 ± 15.68 | 318.14 ± 18.60    |
| <b>Guanfacine</b><br>(n = 10)  | 1110.47 ± 90.16    | 1040.74 ± 119.5  | 7.68 ± 1.27      | 8.19 ± 1.06     | 0.68 ± 0.09           | 0.85 ± 0.14     | 318.97 ± 21.26 | 349.97 ± 25.79    |
| <b>Brimonidine</b><br>(n = 7)  | 1044.28 ± 102.4    | 1023.4 ± 144.2   | 9.4 ± 2.1        | 8.38 ± 1.85     | 1.03 ± 0.3            | 0.93 ± 0.25     | 290.49 ± 19.13 | 304.18 ± 31.09    |
| <b>Cycloguanil</b><br>(n = 11) | 1035.98 ± 94.33    | 1055.7 ± 122.5   | 15.32 ± 5.77     | 15.09 ± 5.3     | 1.27 ± 0.35           | 1.22 ± 0.28     | 319.34 ± 8.47  | 326.95 ± 10.56    |
| <b>Guanabenz</b><br>(n = 11)   | 681.83 ± 78.52     | 773.52 ± 95.37*  | 9.85 ± 2.32      | 28.33 ± 6.81*   | 1.56 ± 0.5            | 3.92 ± 0.73*    | 319.45 ± 13.85 | 415.38 ± 36.55*   |

## 787 **Figures/Table Legends**

788 **Figure 1. Selected FDA-approved drugs after ligand-based in silico**  
789 **screening using GMQ as query molecule.** (A) 2D chemical structure of GMQ  
790 and selected FDA-approved drugs (Guanidine or similar moiety is shown in red)  
791 and alignment of these drugs with GMQ based on molecular electrostatic field  
792 potentials. Forge™ (v 10.4.2; Cresset) was used to align the drug structures with  
793 the energy-minimised structure of GMQ. In all cases, the negative, positive and  
794 hydrophobic field points are coloured blue, red and gold, respectively (van der  
795 Waals isosurfaces are not shown). The sphere size corresponds to possible  
796 interaction strength with the cognate probe used for field point calculation. The  
797 individual molecular field similarity scores to GMQ (maximum value = 1) are given  
798 below right in each panel. (B) Representations of the selected drugs showing  
799 similarity in 3D shape and chemical features with GMQ. Drugs were chosen from  
800 ligand-based in silico screening using ROCS (OpenEye Scientific Software) that  
801 ranked them on the basis of Tanimoto Combo Score. The latter is a sum of Shape  
802 Tanimoto and Colour Tanimoto score indicating similarity in 3D shape (maximum  
803 value = 1) and chemical features (maximum value = 1). The volume of the query  
804 molecule (GMQ) is shown as a dotted area and the chemical similarity aspects  
805 are shown in different colours. The figure was generated by ROCS Report  
806 (OpenEye).

807

808 **Figure 2. Effect of the selected drugs rASIC3 response to pH 6.** (A) Example  
809 traces of the effect for the 5 different selected drugs (500 µM) on pH 6-induced  
810 rASIC3 activation together with example traces showing the effect of known  
811 rASIC3 modulators, APETx2 (1 µM) and GMQ (500 µM). In all cases drugs were  
812 applied for 30 s prior to pH 6-induced rASIC3 activation. (B-D) Bar plots showing  
813 the effect of the selected drugs, APETx2 and GMQ on transient (peak) (B) and  
814 sustained current (C), and inactivation time constant (D) of rASIC3 activation.  
815 Values were normalised to baseline pH 6 rASIC3 activation and expressed as  
816 means ± SEM (n = 7-11, paired t-test, \*p < 0.05 and \*\*\*p ≤ 0.005 vs baseline pH  
817 6 activation).

818

819 **Figure 3. Effect of guanabenz (GBZ) on rASIC3 response to neutral and mild**  
820 **acidic pH.** (A) Example traces of rASIC3 activation at neutral pH elicited by GMQ  
821 (1 mM) and GBZ (1 mM). Inset showing magnification of GBZ activation. (B) Bar  
822 plot showing the quantification of GMQ- and GBZ-induced rASIC3 activation at  
823 neutral pH normalised against ASIC3 pH 6 response. Values were normalised  
824 against pH 6 rASIC3 activation. (C) Example traces of the effect of GMQ and  
825 GBZ potentiation of the pH 7-induced rASIC3 activation. (D) Bar plot showing the  
826 quantification of the potentiation induced by GMQ and GBZ of the pH 7-induced  
827 rASIC3 activation. Values were normalised against the baseline pH 7 ASIC3  
828 activation (n = 6-9, paired t-test, \*p ≤ 0.05, \*\*p ≤ 0.01, \*\*\*\*p ≤ 0.001, vs baseline  
829 pH 6 activation). (E) The ligand interaction diagrams of GMQ and GBZ were  
830 generated using PoseView from their cognate docked complexes (shown in Fig.  
831 4F) with rASIC3 model. (F) GMQ and GBZ were blindly docked to a homology  
832 model of rASIC3 dimer (green = chain C and pale blue = chain A) using  
833 AutoDock4.2.6. Binding poses of the molecules represent the top-ranked docked  
834 pose of individual molecules and are shown in (F) global and (F inset) close-up  
835 views. GMQ and GBZ are shown in red and cyan stick representations,  
836 respectively.

837

838 **Figure 4. Effect of sephin1 on rASIC3 activation.** (A) Comparison of GMQ and  
839 sephin1 2D structure and molecular field electrostatics as described in Fig.1 for  
840 sephin1 (B) Example trace of effect of sephin1 (500 μM) on pH6-induced rASIC3  
841 activation. (B inset) Magnification of rASIC3 activation induced by sephin1 at  
842 neutral pH. (C) Bar plot quantifying sephin1 effect on the transient and sustained  
843 normalised current and inactivation time constant of the pH 6-induced rASIC3  
844 activation expressed as a percentage of the pH 6 baseline activation (n = 10,  
845 paired t-test; \*p <0.05 vs baseline pH 6 activation). (D) Example trace showing  
846 rASIC3 activation by sephin1 at neutral pH. (B inset) Magnification of the current  
847 elicited by sephin1 (n = 12). (E) Dose-response effect of increasing  
848 concentrations of sephin1 (1 nM–3 mM) applied at neutral pH on rASIC3.  
849 Absolute values were normalised using the capacitance of each cell (pA/pF) and  
850 expressed as a percentage of the pH 6-induced rASIC3 activation. A non-linear  
851 regression using a sigmoidal function was used to determine the EC<sub>50</sub> of sephin1  
852 on rASIC3 (n = 4-12, EC<sub>50</sub> = 0.68 mM).



853

854 **Fig. 5. Effect of sephin1 on rASIC3 response to mild acidosis (pH 7) and pH-**

855 **dependency.** (A) Dose-response effect of increasing concentrations of sephin1  
856 (1 $\mu$ M–1mM) applied at pH 7 on rASIC3. (B) Fitting of normalised values for the  
857 transient (peak) and sustained current (pA/pF) obtained in A using a sigmoidal  
858 function. (C and D) Bar plot showing the quantification of the data points obtained  
859 in A for each sephin1 concentration. Normalised values were expressed as a  
860 percentage of the baseline rASIC3 pH 7 activation (n = 8-11, paired t-test, \*\*p  $\leq$   
861 0.01, \*\*\*p  $\leq$  0.005, \*\*\*\*p  $\leq$  0.001, vs baseline pH 7 activation). (E) Ligand  
862 interaction diagram of sephin1 generated using PoseView from its cognate  
863 docked complex with rASIC3 model. (F) GMQ and sephin1 were blindly docked  
864 to a homology model of rASIC3 dimer using AutoDock4.2.6. Binding poses of the  
865 molecules represent the top-ranked docked pose of individual molecules and are  
866 shown in close-up views. GMQ and sephin1 are shown in red and magenta stick  
867 representations, respectively. (G and H) pH-dependent effect of sephin1 on  
868 rASIC3. Example traces of rASIC3 response to a pH range from 7.4 to 5 with and  
869 without sephin1 (500  $\mu$ M) (n = 7-11) (G and H insets) pH-response curves of  
870 rASIC3 activation by different pH extracellular solutions used with (G inset) and  
871 without (H inset) sephin1 (500  $\mu$ M). (I) Bar plot showing the quantification of the  
872 normalised sustained current (pA/pF) elicited by sephin1 at different pH solutions.

873

874 **Table 1. Effect of the selected compounds on rASIC3 current kinetics.**

875 Comparison of the mean  $\pm$  SEM of the amplitude of the transient ( $I_{peak}$ ) and  
876 sustained ( $I_{5s}$ ) current, together with the ratio  $I_{Peak}/I_{5s}$  and the inactivation time  
877 constant ( $\tau$ ) between baseline rASIC3 responses and after compound  
878 application (Paired t-test, \*p  $\leq$  0.05, \*\*p  $\leq$  0.01, \*\*\*p  $\leq$  0.005).

A

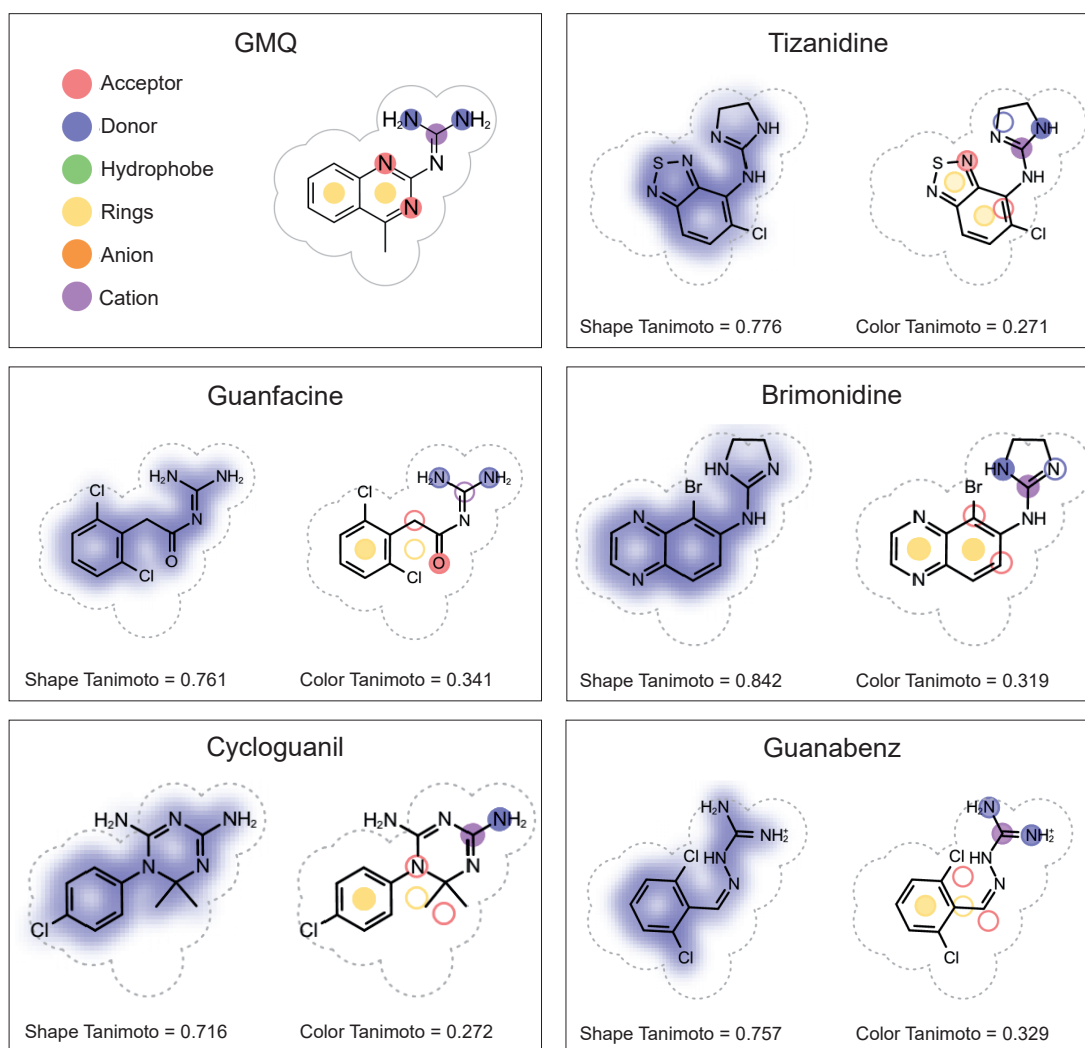

B

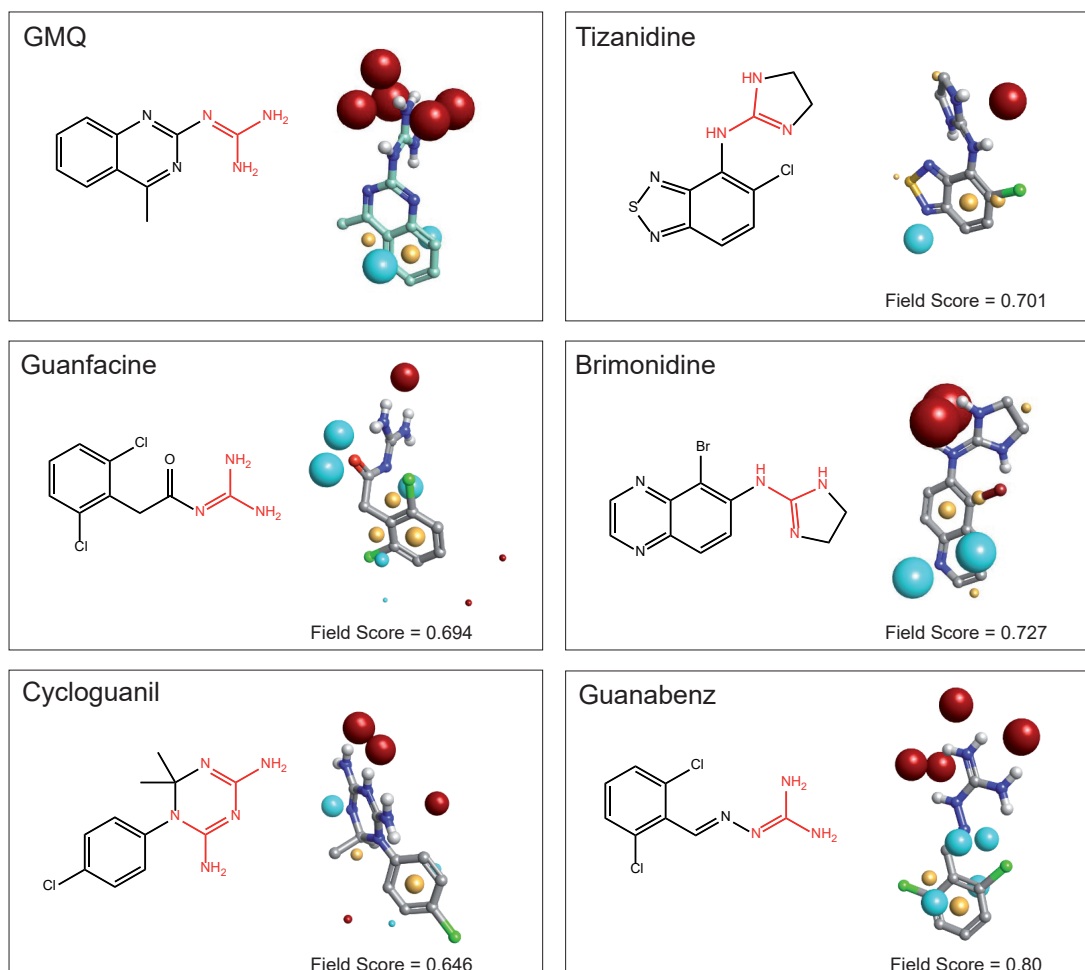

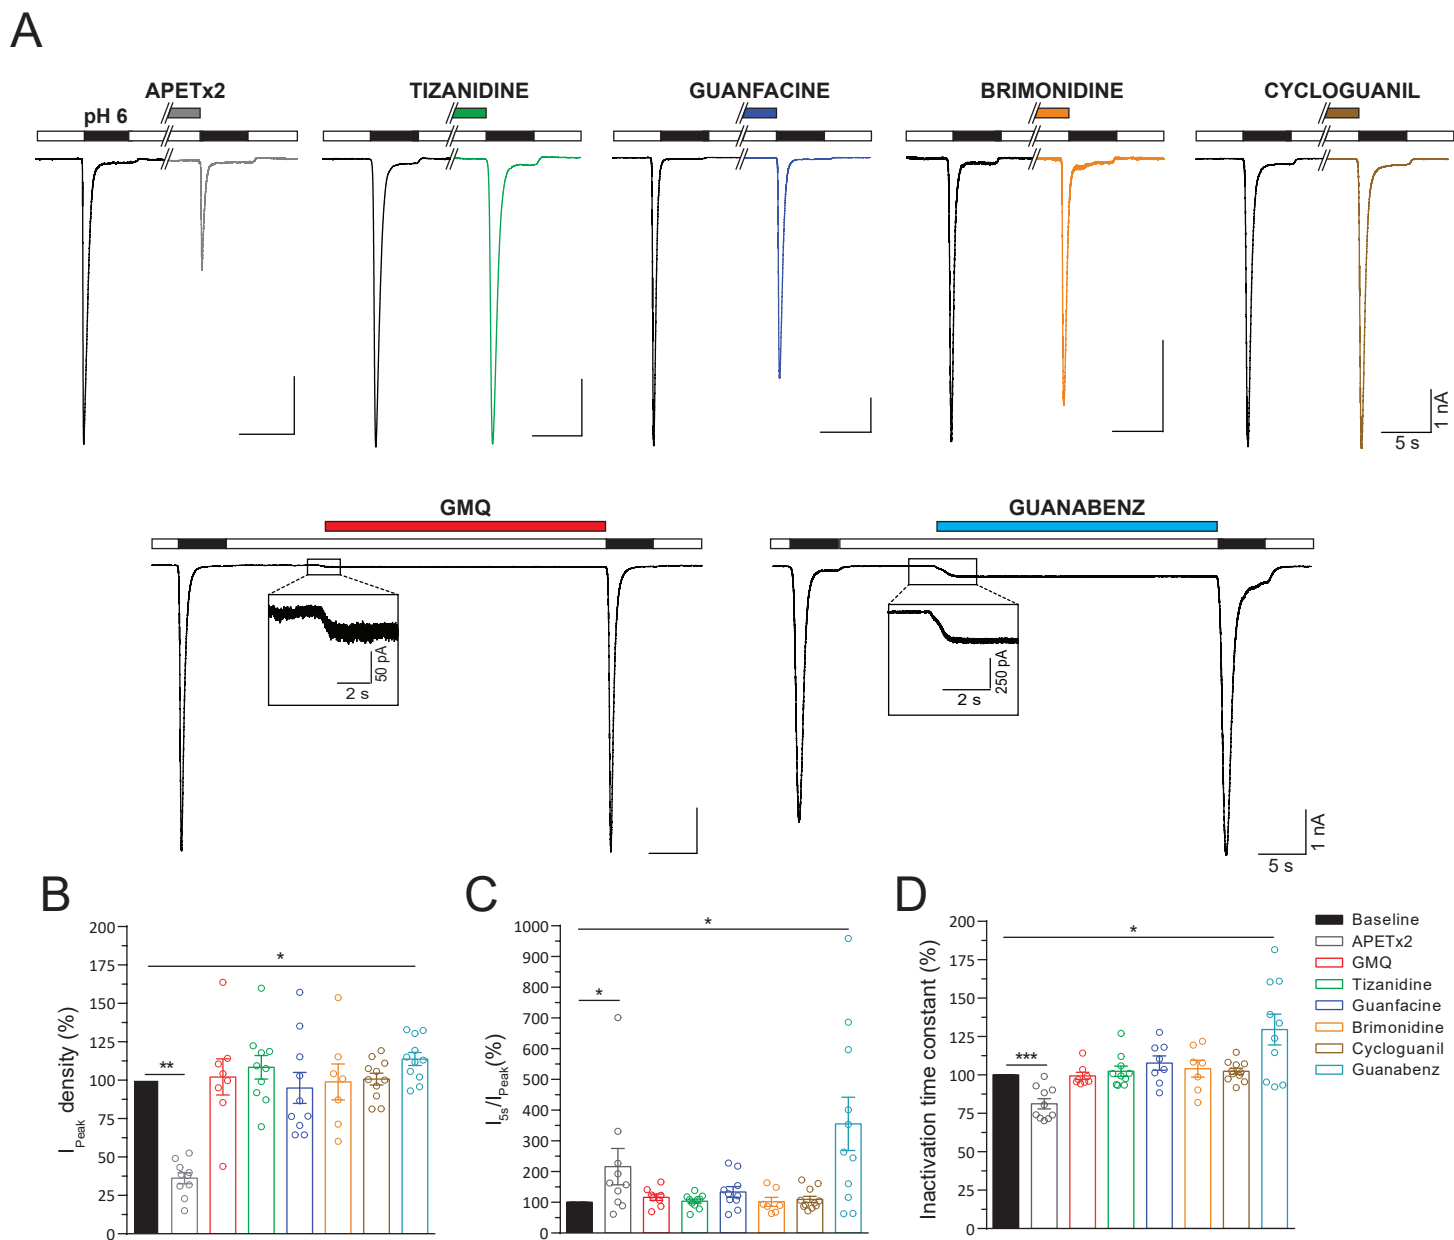

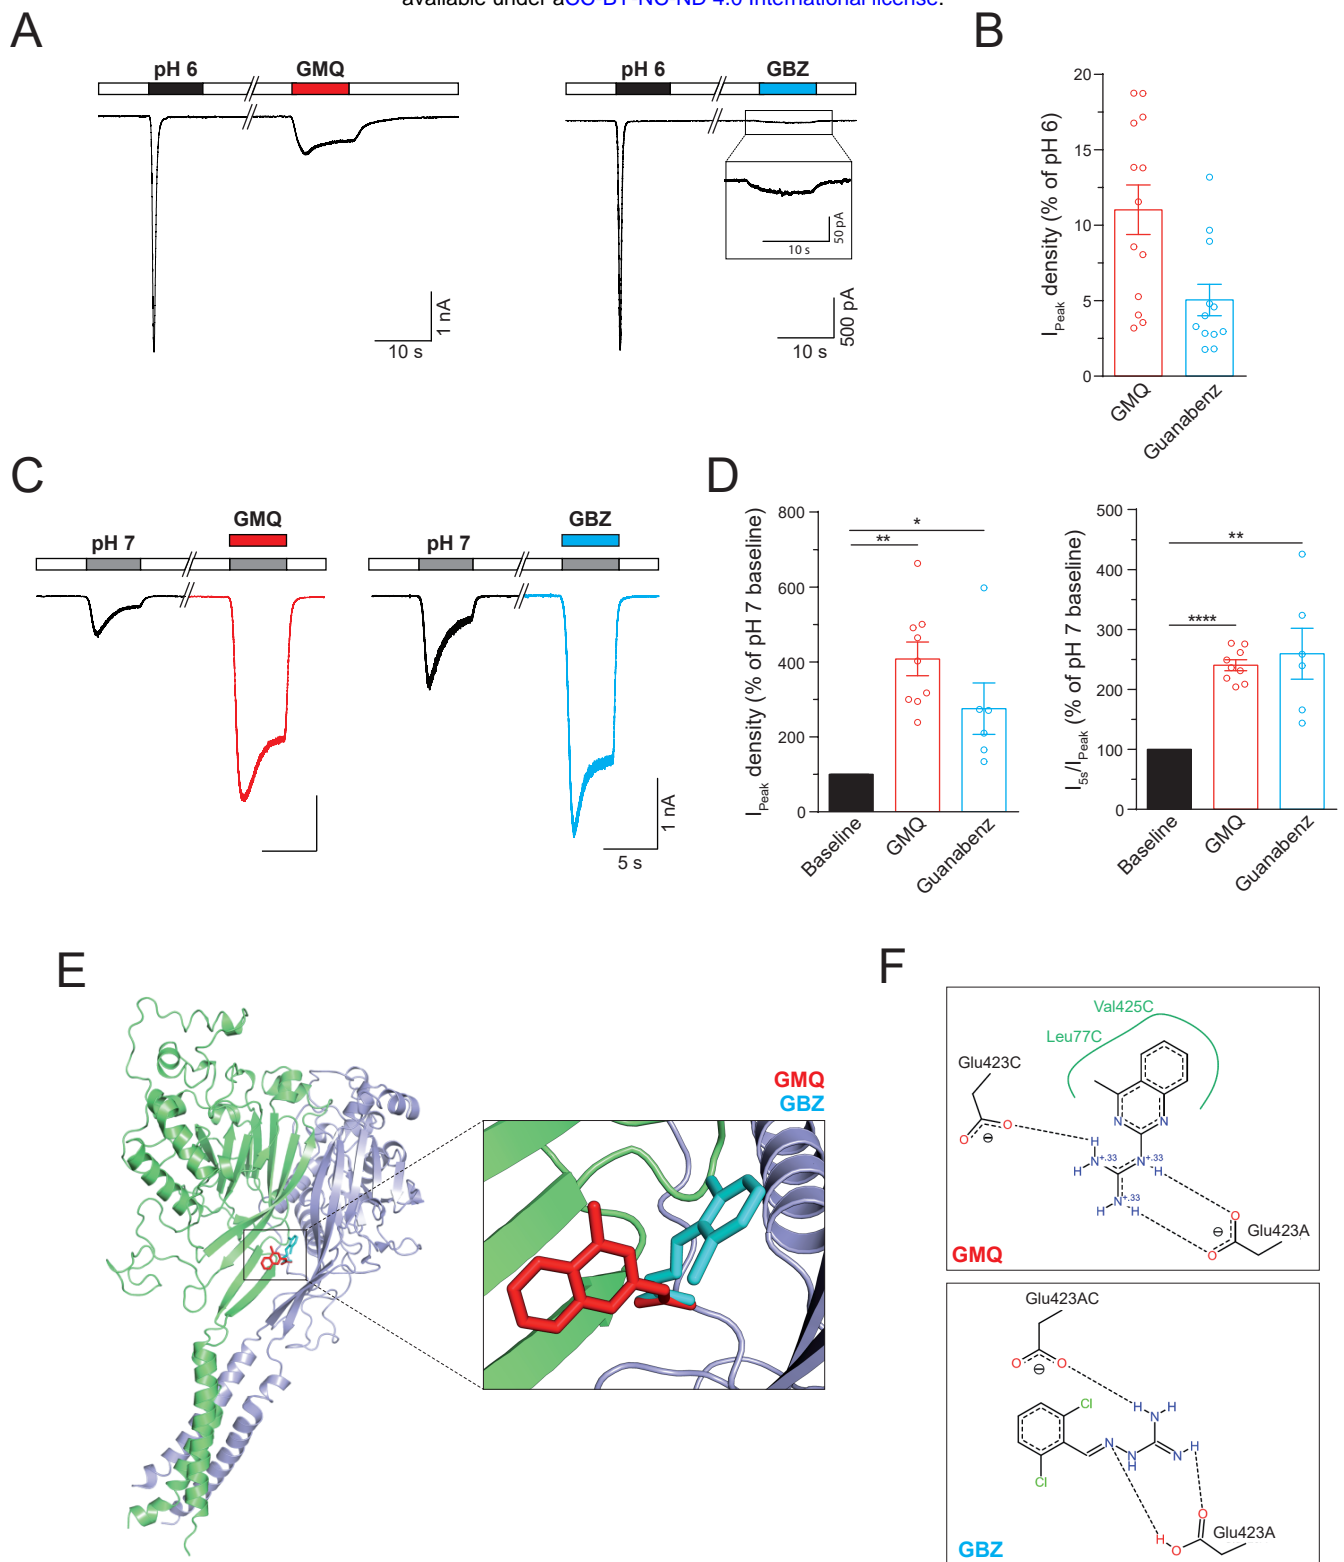

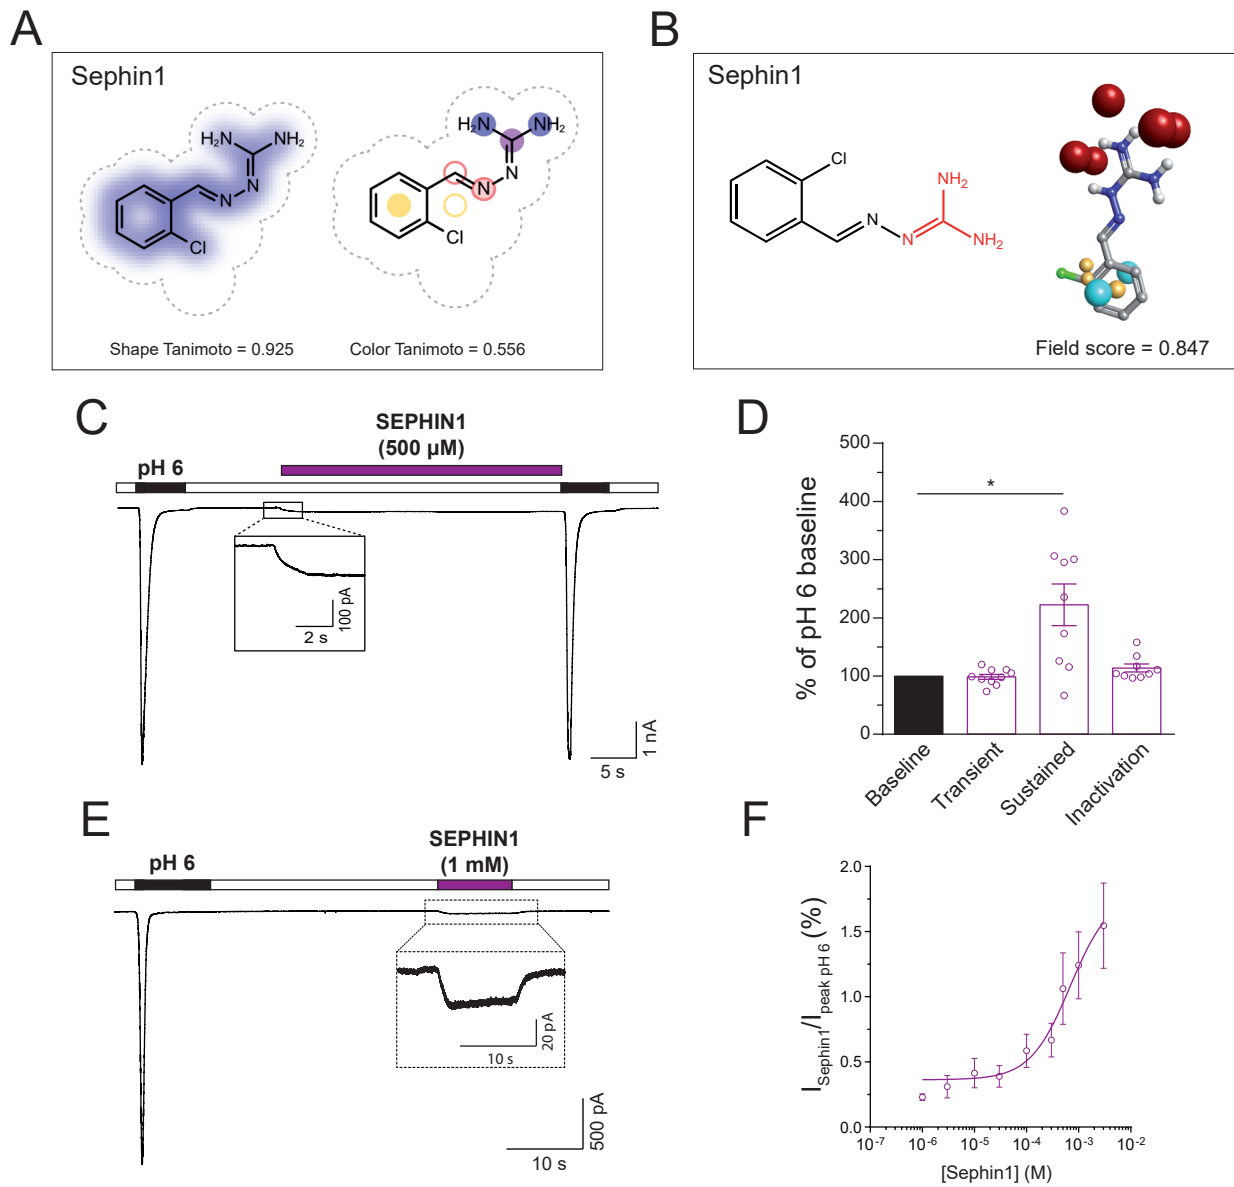

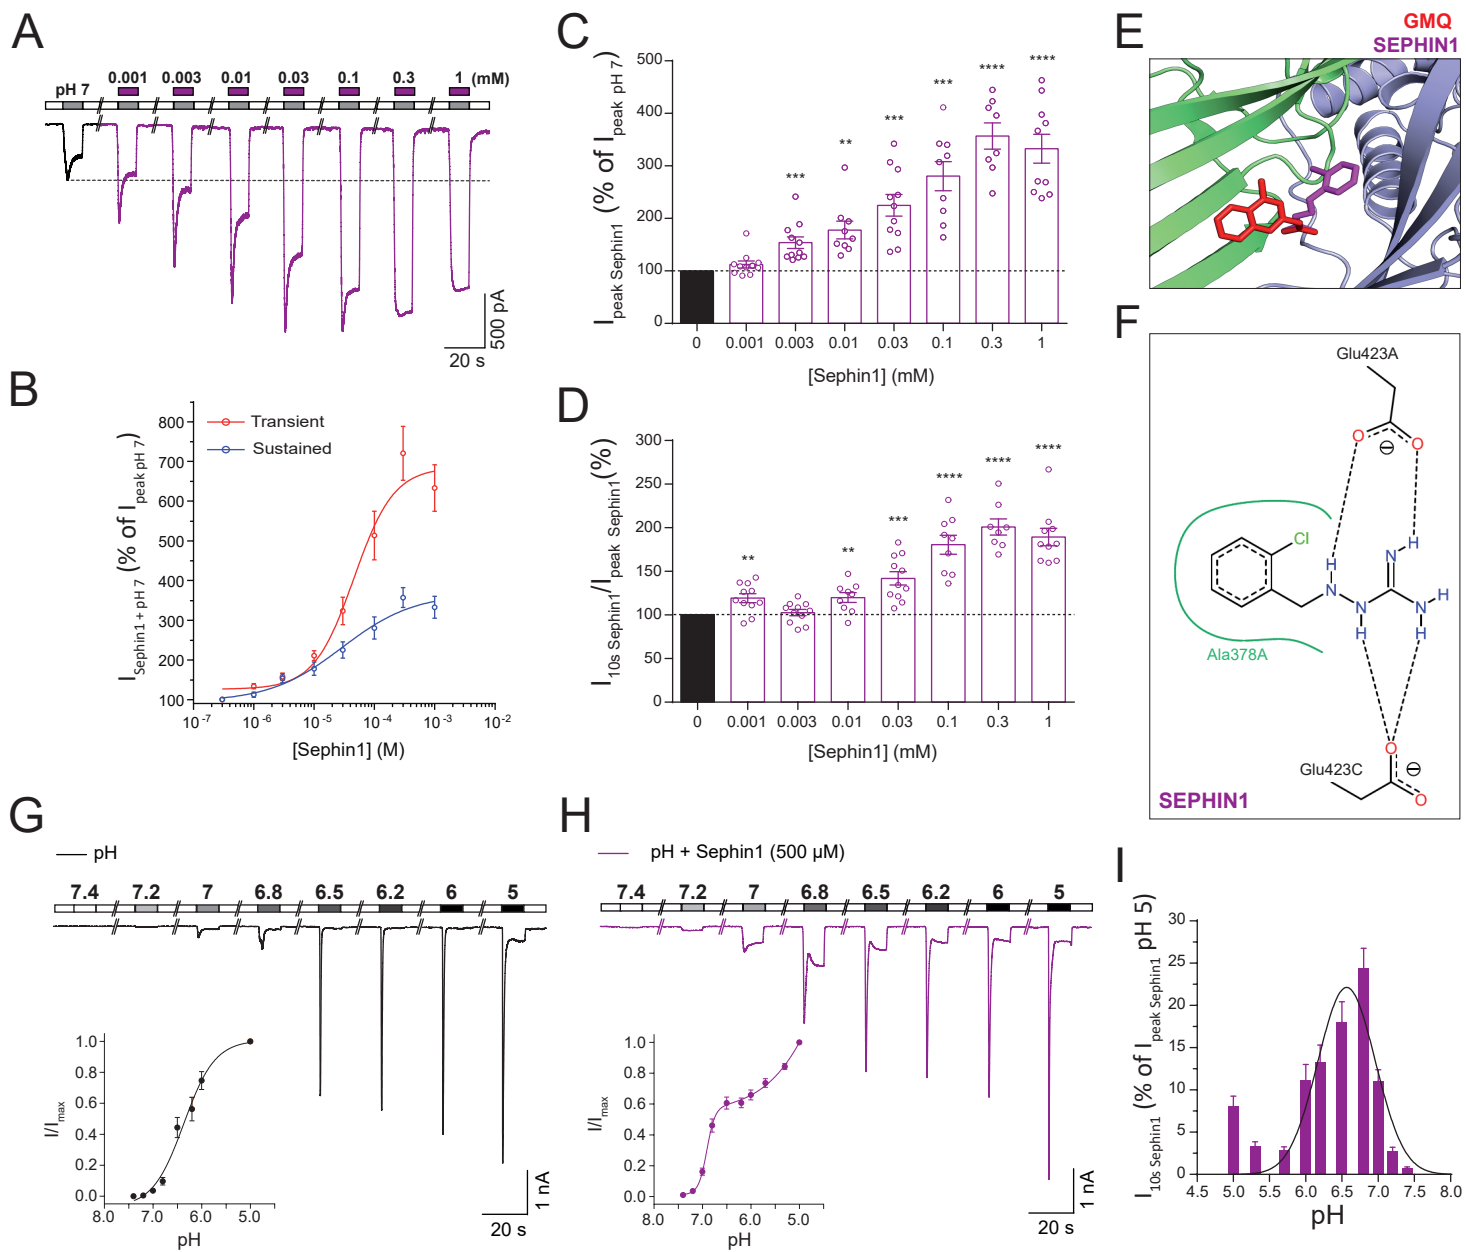

Source: https://www.biorxiv.org/content/10.1101/704445v1.full.pdf
