# ***In silico* screening of GMQ-like compounds reveals guanabenz and sephin1 as new allosteric modulators of acid-sensing ion channel 3**

Gerard Callejo, Luke A. Pattison, Jack C. Greenhalgh, Sampurna Chakrabarti, Evangelia Andreopoulou, James R. F. Hockley, Ewan St. John Smith\* and Taufiq Rahman\*.

*Department of Pharmacology, University of Cambridge, Tennis Court Road, Cambridge CB2 1PD, UK*

*\*Corresponding authors: Ewan St. John Smith, [es336@cam.ac.uk](mailto:es336@cam.ac.uk) and Taufiq Rahman, [mtur2@cam.ac.uk](mailto:mtur2@cam.ac.uk).*

**Keywords:** acid-sensing ion channel, GMQ, Sephin1, nociception

## Abstract

Acid-sensing ion channels (ASICs) are voltage-independent cation channels that detect decreases in extracellular pH. Dysregulation of ASICs underpins a number of pathologies. Of particular interest is ASIC3, which is recognised as the key sensor of acid-induced pain and is instrumental in the establishment of pain arising from inflammatory conditions, such as rheumatoid arthritis. Thus, the identification of new ASIC3 modulators and the mechanistic understanding of how these compounds modulate ASIC3 could be important for the development of new strategies to counteract the detrimental effects of dysregulated ASIC3 activity in inflammation. Here, we report the identification of novel ASIC3 modulators based on the ASIC3 specific agonist, 2-guanidine-4-methylquinazoline (GMQ). Through a GMQ-guided *in silico* screening of Food and Drug administration (FDA)-approved drugs, 5 compounds were selected and tested for their possible modulation of rat ASIC3 (rASIC3) using whole-cell patch-clamp electrophysiology. Of the chosen drugs, guanabenz, an  $\alpha$ 2-adrenoceptor agonist, produced similar effects to GMQ on rASIC3, activating the channel at neutral pH and potentiating its response to mild acidic stimuli. Sephin1, a guanabenz derivative that lacks  $\alpha$ 2-adrenoceptor activity, has been proposed to act as a selective inhibitor of a regulatory subunit of the stress-induced protein phosphatase 1 (PPP1R15A) with promising therapeutic potential for the treatment of multiple sclerosis. However, we found that like guanabenz, sephin1 activates rASIC3 at neutral pH and potentiates its response to acidic stimulation, i.e. sephin1 is a novel modulator of rASIC3. Furthermore, docking experiments showed that, like GMQ, guanabenz and sephin1 likely interact with the nonproton ligand-sensing domain of rASIC3. Overall, these data demonstrate the utility of computational analysis for identifying novel ASIC3 modulators, which can be validated with electrophysiological analysis and may lead to the development of better compounds for targeting ASIC3 in the treatment of inflammatory conditions.

## Introduction

Extracellular protons modulate the activity of a wide range of ion channels and receptors, which activate sensory neurons involved in nociception and the development of pain [1]. One key group of proton sensors is the acid-sensing ion channel (ASIC) family, these voltage-independent, ligand-gated cation channels are activated by extracellular protons [2–4] and belong to the amiloride-sensitive epithelial sodium channel/degenerin (ENaC/DEG) ion channel family [5,6]. In mammals, four genes (*accn1-4*) encode for at least 6 different ASIC subunits (ASIC1a, ASIC1b, ASIC2a, ASIC2b, ASIC3, ASIC4), which can assemble into homo- and heterotrimeric channels displaying different pH sensitivity, current kinetics and pharmacology [7–9]. ASICs are widely expressed in the central and peripheral nervous systems [2,10] and are implicated in a range of physiological and pathological processes including nociception, mechanosensation and learning/memory [2,5,11–13]. The involvement of ASICs in such a plethora of physiological and pathological roles makes them attractive pharmacological targets for drug development and a variety of agents have been identified that act as agonists/antagonists for these channels with differing levels of selectivity [14]. Of the ASIC subunits, there is good evidence that ASIC3 is a critical acid sensor involved in acid-induced pain. ASIC3 homomers are the most sensitive to decreases in extracellular pH [7], in response to which they produce a biphasic inward current composed of a large, rapidly desensitizing transient current, followed by a smaller, non-desensitizing sustained window current (resulting from an overlap between pH-dependent activation and inactivation curves) that lasts for the duration of the acidic stimulus [15,16]. Although protons appear to be the main endogenous activators of ASICs, other molecules that modulate ASIC function have been discovered. For instance, endogenous molecules such as arachidonic acid and anandamide [17], serotonin [18], dynorphins [19] and lactate [20] all enhance ASIC3 currents in response to acidic stimulation. In addition, 2-guanidine-4-methylquinazoline (GMQ) [21], agmatine [22] and lysophosphatidylcholine [23] can activate ASIC3 at neutral pH by increasing the sustained, window current. Moreover, a range of toxins isolated from animal venoms also modulate ASIC function [24]. Among them, APETx2, a toxin isolated from the sea anemone *Anthopleura elegantissima*, inhibits the transient

component of ASIC3 activation in response to an acidic stimulus (pH 4) without affecting its sustained component [25] and it has been used to establish the role of ASIC3 in a number of physiological and pathological processes, including inflammatory pain [26]. Nevertheless, the relationship between ASIC3, pain and inflammation is complex. Several histological studies, as well as those employing pharmacological ASIC3 modulation, have determined an involvement of ASIC3 in pain elicited in deep tissues such as joints, muscle and the viscera [27–33]. However, further studies using ASIC3-deficient mice have suggested a more limited role in pain [34], as well as a proposed dual role of ASIC3 in arthritis where lack of ASIC3 ameliorates pain, but increases inflammatory processes in the arthritic joint [35]. A possible explanation of these controversial results could be that inflammatory processes are sometimes [36], but not always [37], accompanied by acidosis. Nevertheless, the complex and controversial role of ASIC3 in some inflammatory processes requires the development of better pharmacological tools to dissect its precise function in such conditions. To this end, in the present study we hypothesised that we could employ GMQ as a query structure in a ligand-based *in silico* screening of FDA-approved drugs to identify novel ASIC3 modulators. From the results of the screening, we selected five different compounds with chemical and structural similarities to GMQ. From all drugs tested, guanabenz (GBZ), an antihypertensive drug, caused an enhancement of acid-induced rASIC3 activation and, like GMQ, it also activated the channel at neutral pH. Given that GBZ is an agonist of  $\alpha$ 2-adrenoceptors [38], and with the goal of identify a more selective ASIC3 modulator, we evaluated the effect of sephin1, a GBZ derivative that has no adrenoceptor activity that may be of use in protein misfolding diseases such as multiple sclerosis [39]. Similarly to GBZ and GMQ, sephin1 was activated rASIC3 at neutral pH and potentiated its activation in response to a mild acidosis. In summary, we demonstrate that ligand-based *in silico* approaches can be useful to identify novel small molecule modulators of ASIC3. Indeed, we have identified, from a library of FDA-approved drugs that have been proven safe for their use in humans, novel ASIC3 modulators that enhance rASIC3 activity, proving that this approach can serve to identify potential new ASICs modulating drugs that could be useful for treatment of inflammatory disorders.

# **Materials and Methods**

## **Ligand-based screening**

The 3D structure of GMQ was obtained from pubchem (pubchem CID: 345657) and was subsequently energy-minimised using MMFF94 force field implemented in OpenBabel version 2.4.0 [40]. Using the energy-minimised GMQ structure as a 3D query, Rapid Overlay of Chemical Structures (ROCS) (version 3.2.2.2, OpenEye Scientific Software, Santa Fe, NM) [41] was used to screen a conformer library generated from eDrug3D database [42] that contains 1884 different molecular structures including structures of enantiomers and of active metabolites of FDA-approved drugs. The conformer library was generated using Omega 3.0.1.2 (OpenEye Scientific Software) [43]. For each alignment, ROCS compares 3D shape and chemical similarity and returns a Tanimoto Combo (TC) score, ranging from 0 to 2, that includes a Shape Tanimoto (maximum 1) and Colour Tanimoto (scaled colour score, maximum 1) [44]. Following manual inspection of the top 150 hits ranked by the TC score, a subset of drugs was selected for experimental testing. Molecular field-based alignment [45] of drug structures with GMQ was performed using Forge (v 10.4.2; Cresset®, Litlington, Cambridgeshire, UK).

## **Chinese hamster ovary cell culture and transfection**

Chinese hamster ovary (CHO) cells (Sigma, passage 6 to 20) were chosen for this study due to the absence of endogenous ASIC-like currents [46] and were grown using standard procedures in the following medium: Ham's F-12 Nutrient Mixture (Life Technologies), 10 % fetal bovine serum (Sigma), 1 % Penicillin/Streptomycin (100 U/ml, Life Technologies). 24-hours before transfecting cells, 35 mm dishes (Fisher) were coated with 100 µg/ml poly-L-lysine (Sigma) and cells from a 70-80% confluent flask were trypsinised, resuspended in 5 ml CHO medium and a volume was taken to seed cells at a 1:10 dilution (2 ml/dish). For transfections, an EGFP expression vector was used to enable identification of transfected cells and DNA was transfected at a ratio of 20:1 (rASIC3:GFP), using 1.5 µg rASIC3 DNA and 0.075 µg EGFP DNA; the transfection reagent Lipofectamine LTX (Life Technologies) was used according to the manufacturer's protocol.

## Whole-cell electrophysiology

Whole-cell patch clamp recordings from CHO cells were performed at room temperature 24-hours after transfection. For all the experiments, the intracellular solution contained (in mM) 110 KCl, 10 NaCl, 1 MgCl<sub>2</sub>, 1 EGTA, 10 HEPES, 2 Na<sub>2</sub>ATP, 0.5 Na<sub>2</sub>GTP in MilliQ water; pH was set to pH 7.3 by adding KOH and the osmolality was adjusted to 310-315 mOsm with sucrose. The extracellular solution contained (in mM) 140 NaCl, 4 KCl, 2 CaCl<sub>2</sub>, 1 MgCl<sub>2</sub>, 10 HEPES, 4 Glucose in MilliQ water; osmolality was adjusted to 300-310 mOsm with sucrose and pH was adjusted to 7.4 with NaOH. Patch pipettes were pulled from glass capillaries (Hilgenberg) using a Model P-97, Flaming/Brown puller (Sutter Instruments) and had a resistance of 4-8 MΩ. Data were acquired using an EPC10 amplifier (HEKA) and Patchmaster software (HEKA) after suitable resistance compensation. To measure the effect of the different selected compounds on rASIC3 current amplitude and inactivation time constant the following protocol was used. After 5 s of pH 7.4 solution, pH 6 or pH 7 was applied for 5 s to determine the baseline rASIC3 response. Then, in the first group of experiments, a second pH 6 application was performed after 10 s of pH 7.4 and 30 s of compound application to determine the effect of these compounds on rASIC3. In the second group of experiments, after the initial pH 7 baseline rASIC3 response, compounds were applied at pH 7 after 30 s of pH 7.4 to measure the effect of the selected compounds on pH 7 rASIC3 activation. Finally, a third 5 s pH 6 or pH 7 application was performed after 30s of pH 7.4 solution to determine reversibility of any possible effect of the compounds on the channel. For dose-response recordings of sephin1 at neutral pH and pH 7, increasing concentrations of sephin1 were applied for 10 s with a 30 s wash period with extracellular pH 7.4 solution between each application. For pH-response recordings, extracellular solutions with a pH ranging from 7.4 to 5 with/without sephin1 were applied for 10 s with a 30 s wash period between applications. All compounds/acidic solutions were applied to cells through a gravity-driven 12-barrel perfusion system [47]. In all the experiments the holding potential was set at -60mV.

## Molecular Docking

We used a homology model of rASIC3 (Uniprot accession: O35240) based on the 1.9 Å crystal structure of chicken ASIC1 homotrimer (PDB id: 2QTS; [8]) as a template. Detail of the model building was previously reported [48]. Selected drugs were docked to the rASIC3 model using the Lamarckian genetic algorithm (LGA) implemented in AutoDock 4.2.6 [49]. For all docking, an unbiased ("blind") docking approach was used where the entire rASIC3 trimer was used for generating the grid map in AutoGrid. Prior to docking, structures of all drugs (obtained from PubChem) and the rASIC3 trimer were prepared using the AutoDock Tools. Five independent docking runs were performed for each drug and the pose associated with the highest reproducibility and lowest predicted free energy of interaction ( $\Delta G$ , kcal/mol) was considered as the final pose for each drug. From the top-ranked poses of the docked drugs, the 2D ligand interaction diagrams were generated using PoseView™ implemented in the ProteinsPlus webserver (<https://proteins.plus/>). Open-Source PyMOL 1.8 (Schrodinger, LLC) was used for all molecular representations.

## Drugs

All the small molecules used in this study were purchased from Sigma except for tizanidine (Tocris) and APETx2 (Smartox). Stock solutions were made at 100 mM for tizanidine (in H<sub>2</sub>O), guanabenz (EtOH), cycloguanil (DMSO) and sephin1 (DMSO), 50 mM for GMQ (DMSO) and brimonidine (H<sub>2</sub>O), and 40 mM for guanfacine (H<sub>2</sub>O). For most experiments, compounds were diluted in pH 7.4 or pH 7 extracellular solution at 500 µM, however, GMQ, guanabenz and sephin1 were diluted in extracellular pH 7.4 solution at 1 mM for one set of experiments. An APETx2 stock solution was made at 100 µM and diluted at 1 µM in pH 7.4 extracellular solution.

## Data analysis

Absolute peak amplitudes were measured by subtracting the peak amplitude response from the 5-second mean baseline prior to stimulation. Peak amplitude was then normalised by dividing the absolute peak amplitude by the capacitance of the cell to obtain peak current density (pA/pF). The inactivation time constant was measured with a single exponential equation using a built-in function of



210 Fitmaster. The sustained current to transient current ratio was calculated by  
 211 measuring the size of the sustained current (peak sustained response at the end  
 212 of the stimulus minus the 5-second mean baseline current) and dividing his value  
 213 by the peak amplitude current ( $I_{\text{sus}}/I_{\text{peak}} \times 100$ ). The analysis of ASIC3 current  
 214 amplitudes and kinetics was performed as previously reported [9]. Statistical  
 215 analysis was performed in GraphPad Prism using a paired t-test comparing the  
 216 baseline pH response (pA/pF) against the pH response after compound  
 217 application for each cell. Data were plotted as a percentage of the initial pH  
 218 response for each cell. Results are expressed as mean  $\pm$  standard error of the  
 219 mean (SEM), unless otherwise stated. For dose-response curves, all  
 220 measurements were expressed as a percentage of the pH baseline peak current  
 221 value (pH 6 or pH 7). For pH-response curves, all measurements were  
 222 transformed to percent of the maximum peak current ( $I/I_{\text{max}} \times 100$ ). The EC<sub>50</sub> for  
 223 both dose- and pH-response (pH<sub>50</sub>) experiments were determined using a  
 224 standard Hill equation using GraphPad Prism. For the pH-response curve in the  
 225 presence of sephin1 a biphasic equation was used in GraphPad Prism. For the  
 226 analysis of pH-dependent effect of sephin1 on the rASIC3 sustained current a  
 227 Gaussian distribution equation was used in GraphPad Prism. All figures were  
 228 made using GraphPad Prism and Adobe Illustrator CS6.



## Results

### Ligand-based *in silico* screening of novel ASIC3 modulators

Using the energy-minimised 3D structure of GMQ as a query, we used ROCS to screen a conformer library of FDA-approved drugs (eDrug3D) [42]. ROCS aligns each conformer from the target chemical library against the query or bait structure and quantifies the overall similarity between the aligned ligands as the Tanimoto Combo (TC) score. The latter is the sum of the Shape Tanimoto and the Color Tanimoto (scaled colour score), which represent the measure of similarity in 3D shape and chemical properties between the aligned moieties, respectively [44]. Of the top 150 hits ranked by the TC score, we manually inspected each individual hit for the degrees of 3D shape overlap and chemical similarity with GMQ, paying particular attention to the presence of a guanidine (or similar) moiety. This finally led us to shortlist 5 drugs, namely tizanidine (TIZ), cycloguanil (CG), brimonidine (BRI), guanfacine (GF) and GBZ (Fig. 1A). Of these hits, GBZ and GF contain an explicit (i.e. free) guanidine group (shown in red in Fig.1B), whereas CG, BRI and TIZ have an 'implicit' (i.e. within a ring) guanidine moiety.

To assess how these drugs compare to GMQ in terms of overall surface electrostatics, they were aligned to the energy-minimised GMQ structure using the software Forge™ (Cresset, UK), which uses a proprietary molecular mechanics-based ('XED') forcefield to generate and compare molecular 'field points' between aligned molecules (Fig. 1B). These field points represent positions of maximum interaction of a molecule with its electrostatic, steric and hydrophobic surroundings and thus effectively provides a 'protein-centric' view of a ligand. Upon alignment, Forge produces a field similarity score that takes both volume and molecular field points into account and a field score >0.7 is often regarded as indicator of reasonably good electrostatic similarities between the query and the bait molecule [45]. GBZ both qualitatively and quantitatively has the highest field point similarity with GMQ; in decreasing order of similarity of molecular fields, compound similarity with GMQ was computed as: BRI > TIZ > GF > CG (Fig. 1B).

## Effect of selected drugs on acid-induced rASIC3 activation.

The following set of experiments were conducted to determine if the selected drugs modulate rASIC3 function. We performed whole-cell patch clamp recordings in CHO cells co-transfected with rASIC3 and EGFP and evaluated the effect of 30 s application of each drug (500  $\mu$ M) on the rASIC3 response to pH 6. In this series of experiments, we also evaluated the effect of GMQ and APETx2, which were used as positive controls. As expected, in rASIC3-expressing CHO cells, APETx2 (1 $\mu$ M) application did not activate the channel at neutral pH, but produced a significant inhibition of transient ( $I_{Peak}$ , Fig. 2A-B,  $n = 10$ , paired t-test,  $p = 0.0013$ ) and sustained ( $I_{5s}$ , Fig. 2A,  $n = 10$ , paired t-test,  $p = 0.029$ ) current evoked by pH 6 (Table 1). However, the ratio  $I_{5s}/I_{Peak}$  was significantly increased (Fig 2C and Table 1,  $n = 10$ , paired t-test,  $p = 0.036$ ), indicating that the predominant APETx2 inhibitory effect is exerted on the transient phase as previously described [25]. In addition, APETx2 significantly inhibited the inactivation time constant ( $\tau$ ) of rASIC3 (Fig. 2D and Table 1,  $n = 10$ , paired t-test,  $p = 0.0005$ ). By contrast, GMQ generated a sustained inward current at pH 7.4 as reported previously [21], but did not significantly modulate channel current amplitude or inactivation kinetics (Table 1).

Among the 5 drugs tested in these series of experiments (summarised in Table 1), with the exception of GBZ, none of them produced a significant change on rASIC3 current amplitude or inactivation kinetics (Fig. 2B-D). Unlike all other compounds tested, and in a similar fashion to GMQ, we observed that GBZ, a drug currently used to treat hypertension, activated rASIC3 at neutral pH (Fig. 2A). However, unlike GMQ, pre-application of GBZ elicited a significant increase in the transient and sustained components of the pH 6-induced rASIC3 current (Fig. 2B and Table 1,  $I_{Peak}$ ,  $n = 11$ , paired t-test,  $p = 0.0173$ ;  $I_{5s}$ ,  $n = 11$ , paired t-test,  $p = 0.015$ ). The stronger potentiating effect upon the sustained current (403%) compared with the effect on the transient current (113%) produced a significant increase in the  $I_{5s}/I_{Peak}$  ratio (Fig. 2C and Table 1,  $n = 11$ , paired t-test,  $p = 0.016$ ) and the inactivation time constant of the pH 6-induced rASIC3 response was significantly increased by GBZ (Fig. 2D and Table 1,  $n = 11$ , paired t-test,  $p = 0.014$ ).

## Effect of GBZ on rat ASIC3 response to mild acidosis.

Millimolar concentrations of GMQ are required to activate rASIC3 channels at neutral pH, but at micromolar concentrations, GMQ sensitises pH 7-induced rASIC3 channel activation [21]. At neutral pH, even though both GMQ and GBZ (1 mM), are capable of activating rASIC3, the activation of rASIC3 by GBZ is of smaller magnitude compared to GMQ-induced rASIC3 activation ( $11 \pm 1.6\%$  for GMQ vs  $5 \pm 1.1$  for GBZ, Fig.3A and 3B). Given the structural and chemical similarities between GMQ and GBZ (Fig. 1), we next tested the effect GBZ (500  $\mu$ M) on pH 7-induced rASIC3 activation to determine if, like GMQ, it also sensitises the pH 7 response of rASIC3. As expected, the application of GMQ (500  $\mu$ M) at pH 7 elicited a significant sensitisation of rASIC3 by increasing the amplitude of both transient and sustained current components ( $I_{\text{peak}}$  pH 7:  $50 \pm 5.9$  pA/pF vs  $I_{\text{peak}}$  pH 7 + GMQ:  $203.4 \pm 34.8$  pA/pF, paired t-test,  $n = 9$ ,  $p = 0.001$ ;  $I_{5s}$ :  $13.3 \pm 1.5$  pA/pF vs  $132.5 \pm 25.4$  pA/pF, paired t-test,  $n = 9$ ,  $p = 0.0012$ , Fig. 3C and 3D), and also increased the  $I_{5s}/I_{\text{peak}}$  ratio ( $I_{5s}/I_{\text{peak}}$  pH 7:  $26.8 \pm 1.2\%$  vs  $I_{5s}/I_{\text{peak}}$  pH 7 + GMQ:  $63.7 \pm 2\%$ , paired t-test,  $n = 9$ ,  $p < 0.0001$ , Fig. 3D), suggesting a stronger effect on the sustained component of rASIC3. Similarly, GBZ (500  $\mu$ M) potentiated the pH 7-induced rASIC3 activation ( $I_{\text{peak}}$  pH 7:  $159.3 \pm 36$  pA/pF vs  $I_{\text{peak}}$  pH 7 + GBZ:  $418.6 \pm 103.5$  pA/pF, paired t-test,  $n = 6$ ,  $p = 0.038$ ;  $I_{5s}$ :  $52.3 \pm 9.6$  pA/pF vs  $342.1 \pm 82.6$  pA/pF, paired t-test,  $n = 6$ ,  $p = 0.012$ ;  $I_{5s}/I_{\text{peak}}$  pH 7:  $35 \pm 4.9\%$  vs  $I_{5s}/I_{\text{peak}}$  pH 7 + GBZ:  $81.3 \pm 3.2\%$ , paired t-test,  $n = 6$ ,  $p = 0.012$ , Fig. 3B and 3D), suggesting a similar mechanism of rASIC3 modulation. However, as observed for the activation of rASIC3 at neutral pH, the sensitising effect on the transient component of the pH 7-induced rASIC3 activation by GBZ was smaller than that elicited by GMQ, although the effect of both molecules on the ratio  $I_{5s}/I_{\text{peak}}$  was of comparable magnitude ( $I_{\text{peak}}$  GMQ:  $408.1 \pm 44.9\%$  vs  $I_{\text{peak}}$  GBZ:  $275.4 \pm 25.3\%$ ;  $I_{5s}/I_{\text{peak}}$  GMQ:  $240.3 \pm 9.1\%$  vs  $I_{5s}/I_{\text{peak}}$  GBZ:  $259.6 \pm 42.5\%$ , Fig. 3D).

The carboxyl-carboxylate interaction pair formed by the residues E79 and E423 in the palm domain of rASIC3 has been implicated in GMQ binding and the cavity where these two amino acids are localised has been named the 'nonproton ligand sensor domain' because several 'nonproton' ASIC3 ligands such as GMQ,

agmatine and serotonin all bind this domain [18,21,22]. Although GBZ shares certain structural and chemical properties with GMQ, including a guanidine moiety (Fig. 1B), these molecules may or may not share the same binding site or manifest similar binding mode to the same site on ASIC3. To address this aspect, we performed *in silico* blind docking experiments with GMQ and GBZ against our rASIC3 homology model [48]. In this unbiased docking approach, GMQ preferentially docked to a pocket located in the palm domain of rASIC3 (Fig.3E) which has been computationally and experimentally established in previous studies as the likely binding site for GMQ and designated as the nonproton ligand sensor domain [21,50]. In our hands, the guanidinium moiety of GMQ seems to form two salt bridges with E423 whilst the 4-methylquinazoline moiety makes a hydrophobic interaction with L77 and V425 (Fig. 3F). Interestingly, GBZ also docked to the same location (Fig. 3E). Whilst similar salt bridges are also retained in the best docked pose of GBZ, no comparable hydrophobic interactions were discernible with L77 and V425, presumably due to lack of an additional aromatic ring when compared to GMQ structure (Fig.3F).

Taken together, these results indicate that GBZ modulates rASIC3 in the mild acidic range and that its binding site likely overlaps with that of GMQ, the so called nonproton ligand sensor domain. However, their precise modes of binding may be different, which may underlie the different potencies observed on rASIC3 current activation.

### **The GBZ derivative, sephin1, positively modulates rASIC3**

Recently, it has been demonstrated that a GBZ derivative without  $\alpha 2$ -adrenoceptor activity, sephin1 (also known as IFB-088; Fig.4A) acts as an inhibitor of a regulatory subunit of the stress-induced protein phosphatase 1 (PPP1R15A) [51]. Sephin1 is effectively the mono-chlorinated version of GBZ and is currently under investigation in clinical trials and hence was not included in the eDrug3D database that we initially screened with ROCS using GMQ as bait. ROCS-based alignment of sephin1 with GMQ revealed by far the highest similarity among the 5 initially selected FDA-approved compounds in terms of both 3D shape (>90%) and chemical features (>50%) with an overall TC score of

1.481 (Fig. 4A). In agreement with this, sephin1 appeared to be the most similar to GMQ among all FDA-approved selected drugs in terms of the molecular field points with the highest overall field score (Field Score = 0.847, Fig. 4B).

Given the high molecular similarity observed *in silico* for sephin1 and GMQ/GBZ, we evaluated the effect of sephin1 on the acid-induced rASIC3 response. Firstly, we observed that sephin1 (500  $\mu$ M) did not affect the transient component of pH 6-induced rASIC3 activation, but it did induce an increase in the amplitude of the sustained component ( $I_{\text{peak}}$  pH 6:  $782.8 \pm 98.5$  pA/pF vs  $I_{\text{peak}}$  pH 6 + sephin1:  $775.1 \pm 108.7$  pA/pF, paired t-test,  $n = 10$ ,  $p = 0.82$ ;  $I_{5s}$  pH 6:  $4.3 \pm 0.6$  pA/pF vs  $I_{5s}$  pH 6 + sephin1:  $11.2 \pm 2.8$  pA/pF, paired t-test,  $n = 10$ ,  $p = 0.03$ , Fig. 4B and 4C) without significantly affecting the  $I_{5s}/I_{\text{peak}}$  ratio ( $I_{5s}/I_{\text{peak}}$  pH 6:  $0.3 \pm 0.1$  pA/pF vs  $I_{5s}/I_{\text{peak}}$  pH 6 + sephin1:  $0.6 \pm 0.2$  pA/pF, paired t-test,  $n = 10$ ,  $p = 0.13$ ) or the inactivation time constant (Tau:  $301.4 \pm 16.5$  ms vs  $336.9 \pm 34.4$  ms, paired t-test,  $n = 10$ ,  $p = 0.09$ , Fig. 4C). Similarly to GMQ and GBZ, both 500  $\mu$ M and 1 mM sephin1 also activated rASIC3 at neutral pH (Fig. 4C and 4E insets) with an  $EC_{50}$  of a similar magnitude to that described for GMQ (GMQ = 0.68 mM [21] vs. sephin1 = 0.35 mM) (Fig. 4F). Furthermore, like GMQ and GBZ, sephin1 induced a strong sensitisation, in a dose-dependent fashion, of the transient and sustained components of the pH 7-induced rASIC3 activation (Fig. 5A-D), revealing an  $EC_{50}$  of 28.93  $\mu$ M for the rASIC3 transient current at pH 7 (Fig. 5B). Given the high similarities in the action of sephin1 and GMQ, we hypothesized that sephin1 also binds to the nonproton ligand sensor domain of rASIC3. Similarly to GBZ, *in silico* blind docking experiments showed the likely interaction of sephin1 with the E423 of the nonproton ligand sensor domain, but not E79, together with possible hydrophobic interaction of the aromatic ring of sephin1 with residue A378 (Fig. 5E and 5F). We next tested the pH dependency of rASIC3 modulation by sephin1. The application of different pH solutions ranging from pH 7.4 to 5 (Fig. 5G and 5H) on rASIC3 induced currents of increasing magnitude to produce a sigmoidal curve that could be fitted to reveal a  $pH_{50}$  value of 6.36 (Fig. 5G inset), in accordance with previous reports [7,52]. However, in the presence of sephin1 (500  $\mu$ M), rASIC3 transient activation followed a pH-dependent, biphasic curve (Fig. 5H inset), suggesting an interplay between the action of sephin1 on rASIC3 and its proton activation. As showed previously by Yu et al.

395 using GMQ [21], sephin1 activated rASIC3 at neutral pH, but also potentiated its  
 396 sustained current at all pH solutions tested, showing a Gaussian distribution with  
 397 a peak at pH 6.56 ( $r^2 = 0.43$ , Fig. 5I). Altogether, these results show that sephin1  
 398 modulates rASIC3 activation possibly through interacting with the nonproton  
 399 ligand sensor domain of the channel.



## Discussion

The ASIC family of ion channels have been implicated in many physiological and pathological processes including nociception [53–55], where they have been established as attractive pharmacological targets for treating pain. ASIC3 is considered of particular interest given its high expression in primary sensory neurones [10] and its involvement in inflammatory pain originating from different tissues including muscle, joints and skin [26–28,56–58]. Therefore, the exploration of novel ASIC3 modulators could increase our knowledge of ion channel function and also be pivotal for the development of new strategies to counteract the detrimental effects of dysregulated ASIC3 activity in pathophysiological states. Many molecules that modulate ASIC3 function have been discovered, ranging from non-selective ASIC3 blockers such as amiloride that acts as a pore blocker and paradoxically stimulates ASIC3 at neutral pH [3], to more specific molecules, such as the inhibitory toxin APETx2, which inhibits the acid-induced transient ASIC3 current [25], and the selective agonist GMQ, which activates ASIC3 at neutral pH and potentiates its activation in response to an acidic stimulus through the nonproton ligand sensor domain of ASIC3 [21,61]. In the present study, we used a ligand-based *in silico* screening of FDA-approved drugs to identify novel rASIC3 modulators. Of the top 150 hits ranked by TC score, we selected 5 different drugs with the highest structural and chemical resemblance to GMQ (Fig. 1A), including the presence of a guanidine group. Using an independent algorithm implemented in Cresset's Forge™, we then aligned these 5 drugs with GMQ and compared their surface electrostatic properties represented by the molecular field points. Of the selected drugs, GBZ showed a striking resemblance to GMQ with regard to surface electrostatics and this was reflected in the highest observed value for the field score (0.80). Of the remaining 4 drugs, only BRI which had the 2<sup>nd</sup> best field score, showed some degree of electrostatic similarity with GMQ (Fig.1B).

We next sought to experimentally evaluate the effects of these drugs on acid-induced rASIC3 activation. Only one of the drugs tested showed a modulatory effect on rASIC3 acid response to pH 6, namely GBZ, an  $\alpha$ 2-adrenoceptor agonist. When compared to GMQ, GBZ exhibited a high TC score (1.086) (Fig.



1B) and the highest molecular field score (0.8) among the FDA-approved drugs selected (Fig. 1), together with the presence of an explicit guanidine group. Interestingly, TIZ and BRI that showed a higher TC score (Fig. 1A; 1.047 and 1.161, respectively) than GBZ and a lower field score in terms of surface electrostatics but the presence of an implicit guanidine moiety (Fig. 1B), did not modulate rASIC3 function, suggesting that a combination of structural and chemical similarities with GMQ and the presence of an explicit guanidine group are required to modulate ASIC3. Nevertheless, it was perhaps unsurprising to observe that GBZ followed a similar mode of action to GMQ, being capable of activating rASIC3 at neutral pH (Fig. 2A and 3A) and inducing a non-desensitising inward current, however its potency was lower than that described for GMQ. Based on our findings from the blind docking experiments against the rASIC3 homology model (Fig. 3E), this difference could be explained by the lack of interaction with the core residue L77 and the adjacent residue V425. Such interactions are observed for GMQ in our docking experiment (Fig. 3F) and have been previously shown to be important in the interaction of the 4-methylquinazoline moiety of GMQ [61]. This is plausible because, unlike GMQ, GBZ lacks a second aromatic moiety in an appropriate position to allow such hydrophobic contacts. Moreover, the sensitisation of the pH 6-induced rASIC3 activation observed by GBZ (Fig. 2A and 2B) suggests a more pronounced effect of the drug in channel opening and desensitisation in response to low acidic stimulus, contrary to the more dominant effect of protons in the GMQ sensitisation at lower pH [21].

GBZ is an orally active  $\alpha$ 2-adrenoceptor agonist that has been used for many years as an antihypertensive drug [62]. However, GBZ also binds to the regulatory subunit of protein phosphatase 1, PPP1R15A, disrupting the stress-induced dephosphorylation of the  $\alpha$  subunit of the translation initiation factor 2 (eIF2 $\alpha$ ), which protects against the detrimental accumulation of misfolded proteins in the endoplasmic reticulum (ER) [63] and has been proven effective in animal models that mimic misfolding protein diseases such as multiple sclerosis [64]. A recent study has identified a mono-chlorinated version of GBZ, sephin1, which retains the GBZ PPP1R15A inhibition activity, but without adrenoceptor activity [51] and it has also been shown to be effective in animal models of

amyotrophic lateral sclerosis [51], Charcot-Marie-Tooth 1B (CMT1B) neuropathy [51] and multiple sclerosis [39]. Given the efficacy of sephin1 to ameliorate the pathogenesis of misfolding protein diseases, InFlectis Bioscience has begun the Phase I clinical trials to evaluate the safety of sephin1 (IFB-088) with the aim of evaluating its effect on the treatment of Charcot-Marie-Tooth 1B (CMT1B) disorder.

As a result of the similar pharmacological profile of GBZ to GMQ and with the intention of identifying a more selective rASIC3 modulator without adrenoceptor activity, we tested the effect of sephin1 on acid-induced rASIC3 activation. We observed that sephin1 shared a similar pharmacological profile with GBZ and GMQ, sensitising the response (sustained component) of rASIC3 to low pH (pH 6) (Fig. 4C and 4D) and mild acidosis (pH 7) (Fig. 5A-D), and activating rASIC3 at neutral pH (Fig.4E). These results were consistent with our expectations given that sephin1 appeared to be most similar to GMQ in terms of structural and chemical properties, exhibiting the highest TC score (Fig. 4A), and in terms of molecular field points with the highest overall field score (Fig. 4B). Moreover, increasing concentrations of sephin1 induced increasing potentiation of the pH 7-induced rASIC3 activation (Fig. 5A). Our docking experiments indicated that sephin1 is likely to bind to the nonproton ligand sensor domain and, as we observed for GMQ and GBZ, the negatively charged residue E423 is likely to interact with the explicit guanidinium group of sephin1 (Fig. 5E and 5F). However, compared to GBZ, sephin1's lack of a chloride atom in the aromatic ring seems to allow it to make hydrophobic interactions with surrounding residues like A378, but not with L77 and Val425 as observed for GMQ (Fig.3F). Overall, these interactions likely underlie differential recognition of sephin1 at the nonproton ligand sensor domain of ASIC3, compared to that of GMQ and GBZ.

Sephin1 is able to selectively disrupt the PPP1R15A-PP1c complex at 50  $\mu$ M in cells *in vitro* and after oral administration, sephin1 accumulates in the nervous system reaching concentrations of up to 1  $\mu$ M in the brain and sciatic nerve [51]. Moreover, a 2-week treatment with sephin1 at 100 nM has shown efficacy in rescuing myelination of the dorsal root ganglia in a mouse model that mimics Charcot-Marie-Tooth 1B (CMT1B) in humans. Given the high functional

expression of rASIC3 in DRG neurones and its involvement in pain derived from inflammatory diseases, together with the action of sephin1 observed on the channel, it is possible that sephin1 treatment could induce and/or exacerbate pain due to the activation of ASIC3 in DRG neurones, however our results show that both activation of rASIC3 at neutral pH and potentiation of the response to mild acidosis (pH 7) require higher concentrations of sephin1 (Fig. 4F and 5A) than those observed to be beneficial in treating misfolding protein diseases in mice. However, the possible additive effects of ASIC3 activated by sephin1 and other endogenous molecules found in the inflammatory soup such as arachidonic acid, which also potentiates acid-induced response of ASIC3 [17] cannot be excluded. Moreover, ASICs function as trimers, displaying different pharmacological profiles depending upon subunit composition. In the present study, we have not evaluated the effect of sephin1 in heteromeric ASIC3-containing channels or other homomeric ASIC channels, and therefore, we cannot hypothesise what might be the potential effects of sephin1 *in vivo*. For instance, GMQ modulates ASIC1a and ASIC1b by shifting their pH dependence of activation to more acidic values [60], precisely the opposite effect seen for ASIC3, effect attributed to structural differences in the extracellular domain of ASIC1a/b and ASIC3 [65]. Given the pharmacological and structural resemblance of sephin1 to GMQ, it is possible that sephin1 induces similar modulatory effects on other ASIC subunits. Nevertheless, we believe that the evaluation of pain thresholds in mice and humans used to study the effect of sephin1 in misfolding protein disease should be considered in future studies.

In summary, we have identified new rASIC3 modulators using a ligand-based *in silico* approach, namely GBZ and sephin1, and evaluated their effect on rASIC3 function using electrophysiology. Here we provide proof of principle, using a size-restricted chemical library (i.e. FDA-approved drug library), but believe this approach can be exploited in the future to screen much larger chemical space, enabling the identification of novel chemical scaffolds that act as ASIC modulators.

## Acknowledgements

The authors declare no competing financial interests. This work was supported by Versus Arthritis Research Grants (RG20930 and RG21973; GC and EStJS), BBSRC grant (BB/R006210/1; JRFH and EStJS), BBSRC-funded studentships (LAP and JCG, BB/M011194/1) and Gates Cambridge Trust (SC). TR gratefully acknowledges OpenEye Scientific Software and Cresset for granting academic licenses for some software used in the present study.

## Author Contributions

GC designed the research, conducted the experiments, acquired and analysed the data and wrote the manuscript. LAP, JCG, SC, EA and JRFH acquired and analysed the data. TR and EStJS designed the research and wrote the manuscript. All authors approved the final version of the manuscript.

## Declaration of Conflicting Interests

The authors have no conflicting interests to declare.

## References

- [1] L.A. Pattison, G. Callejo, E. St John Smith, Evolution of acid nociception: ion channels and receptors for detecting acid, *Philos. Trans. R. Soc. B*. In press (2019).
- [2] S. Kellenberger, L. Schild, International Union of Basic and Clinical Pharmacology. XCI. Structure, Function, and Pharmacology of Acid-Sensing Ion Channels and the Epithelial Na<sup>+</sup> Channel., *Pharmacol. Rev.* 67 (2015) 1–35. doi:10.1124/pr.114.009225.
- [3] R. Waldmann, G. Champigny, F. Bassilana, C. Heurteaux, M. Lazdunski, A proton-gated cation channel involved in acid-sensing, *Nature*. 386 (1997) 173–177.
- [4] S. Gründer, M. Pusch, Biophysical properties of acid-sensing ion channels (ASICs), *Neuropharmacology*. 94 (2015) 9–18. doi:10.1016/j.neuropharm.2014.12.016.
- [5] E. Deval, E. Lingueglia, Acid-Sensing Ion Channels and nociception in the peripheral and central nervous systems, *Neuropharmacology*. 94 (2015) 49–57. doi:10.1016/j.neuropharm.2015.02.009.
- [6] S. Gründer, M. Pusch, Neuropharmacology Biophysical properties of acid-sensing ion channels ( ASICs ), *Neuropharmacology*. (2015) 1–10. doi:10.1016/j.neuropharm.2014.12.016.
- [7] M. Hesselager, pH Dependency and Desensitization Kinetics of Heterologously Expressed Combinations of Acid-sensing Ion Channel Subunits, *J. Biol. Chem.* 279 (2004) 11006–11015.
- [8] J. Jasti, H. Furukawa, E.B. Gonzales, E. Gouaux, Structure of acid-sensing ion channel 1 at 1.9 Å resolution and low pH., *Nature*. 449 (2007) 316–23. doi:10.1038/nature06163.
- [9] L.-N. Schuhmacher, G. Callejo, S. Srivats, E.S.J. Smith, Naked mole-rat acid-sensing ion channel 3 forms nonfunctional homomers, but functional heteromers, *J. Biol. Chem.* 1 (2017) jbc.M117.807859. doi:10.1074/jbc.M117.807859.
- [10] L.-N. Schuhmacher, E.S.J. Smith, Expression of acid-sensing ion channels and selection of reference genes in mouse and naked mole rat, *Mol. Brain*. 9 (2016) 97. doi:10.1186/s13041-016-0279-2.

- [11] E. Boscardin, O. Alijevic, E. Hummler, S. Frateschi, S. Kellenberger, The function and regulation of acid-sensing ion channels (ASICs) and the epithelial Na<sup>+</sup> channel (ENaC): IUPHAR Review 19, Br. J. Pharmacol. (2016) 2671–2701. doi:10.1111/bph.13533.
- [12] D. Omerbašić, L.-N. Schuhmacher, Y.-A. Bernal Sierra, E.S.J. Smith, G.R. Lewin, ASICs and mammalian mechanoreceptor function., Neuropharmacology. (2014) 1–7. doi:10.1016/j.neuropharm.2014.12.007.
- [13] G. Callejo, A. Castellanos, M. Castany, A. Gual, C. Luna, M.C. Acosta, J. Gallar, J.P. Giblin, X. Gasull, Acid-sensing ion channels detect moderate acidifications to induce ocular pain, Pain. 156 (2015) 483–495. doi:10.1097/01.j.pain.0000460335.49525.17.
- [14] A. Baron, E. Lingueglia, Pharmacology of acid-sensing ion channels - Physiological and therapeutical perspectives., Neuropharmacology. (2015) 1–17. doi:10.1016/j.neuropharm.2015.01.005.
- [15] R. Waldmann, F. Bassilana, J. de Weille, G. Champigny, C. Heurteaux, M. Lazdunski, Molecular Cloning of a Non-inactivating Proton-gated Na<sup>+</sup> Channel Specific for Sensory Neurons, J. Biol. Chem. 272 (1997) 20975–20978. doi:10.1074/jbc.272.34.20975.
- [16] J. Yagi, H.N. Wenk, L. a Naves, E.W. McCleskey, Sustained currents through ASIC3 ion channels at the modest pH changes that occur during myocardial ischemia., Circ. Res. 99 (2006) 501–9. doi:10.1161/01.RES.0000238388.79295.4c.
- [17] E.S. Smith, H. Cadiou, P. a. McNaughton, Arachidonic acid potentiates acid-sensing ion channels in rat sensory neurons by a direct action, Neuroscience. 145 (2007) 686–698. doi:10.1016/j.neuroscience.2006.12.024.
- [18] X. Wang, W.-G. Li, Y. Yu, X. Xiao, J. Cheng, W.-Z. Zeng, Z. Peng, M. Xi Zhu, T.-L. Xu, Serotonin facilitates peripheral pain sensitivity in a manner that depends on the nonproton ligand sensing domain of ASIC3 channel., J. Neurosci. 33 (2013) 4265–79. doi:10.1523/JNEUROSCI.3376-12.2013.
- [19] T.W. Sherwood, C.C. Askwith, Dynorphin opioid peptides enhance acid-sensing ion channel 1a activity and acidosis-induced neuronal death., J. Neurosci. 29 (2009) 14371–80. doi:10.1523/JNEUROSCI.2186-09.2009.
- [20] D.C. Immke, E.W. McCleskey, Lactate enhances the acid-sensing Na<sup>+</sup>



- channel on ischemia-sensing neurons., *Nat. Neurosci.* 4 (2001) 869–70.  
doi:10.1038/nn0901-869.
- [21] Y. Yu, Z. Chen, W.-G. Li, H. Cao, E.-G. Feng, F. Yu, H. Liu, H. Jiang, T.-L. Xu, A nonproton ligand sensor in the acid-sensing ion channel., *Neuron*. 68 (2010) 61–72. doi:10.1016/j.neuron.2010.09.001.
- [22] W.-G. Li, Y. Yu, Z.-D. Zhang, H. Cao, T.-L. Xu, ASIC3 channels integrate agmatine and multiple inflammatory signals through the nonproton ligand sensing domain., *Mol. Pain*. 6 (2010) 88. doi:10.1186/1744-8069-6-88.
- [23] S. Marra, R. Ferru-clément, V. Breuil, A. Delaunay, M. Christin, V. Friend, S. Sebillé, C. Cognard, T. Ferreira, C. Roux, L. Euller-ziegler, J. Noel, E. Lingueglia, E. Deval, Non-acidic activation of pain-related Acid-Sensing Ion Channel 3 by lipids, *EMBO J.* 35 (2016) 1–15. doi:10.15252/emboj.201592335.
- [24] B. Cristofori-Armstrong, L.D. Rash, Acid-sensing ion channel (ASIC) structure and function: Insights from spider, snake and sea anemone venoms, *Neuropharmacology*. 127 (2017) 173–184. doi:10.1016/j.neuropharm.2017.04.042.
- [25] S. Diochot, A. Baron, L.D. Rash, E. Deval, P. Escoubas, S. Scarzello, M. Salinas, M. Lazdunski, A new sea anemone peptide, APETx2, inhibits ASIC3, a major acid-sensitive channel in sensory neurons., *EMBO J.* 23 (2004) 1516–25. doi:10.1038/sj.emboj.7600177.
- [26] E. Deval, J. Noël, N. Lay, A. Alloui, S. Diochot, V. Friend, M. Jodar, M. Lazdunski, E. Lingueglia, ASIC3, a sensor of acidic and primary inflammatory pain, *EMBO J.* 27 (2008) 3047–3055.
- [27] W.S. Hsieh, C.C. Kung, S.L. Huang, S.C. Lin, W.H. Sun, TDAG8, TRPV1, and ASIC3 involved in establishing hyperalgesic priming in experimental rheumatoid arthritis, *Sci. Rep.* 7 (2017) 1–14. doi:10.1038/s41598-017-09200-6.
- [28] M. Ikeuchi, S.J. Kolker, L.A. Burnes, R.Y. Walder, K.A. Sluka, Role of ASIC3 in the primary and secondary hyperalgesia produced by joint inflammation in mice., *Pain*. 137 (2008) 662–9. doi:10.1016/j.pain.2008.01.020.
- [29] M. Ikeuchi, S.J. Kolker, K.A. Sluka, Acid-sensing ion channel 3 expression in mouse knee joint afferents and effects of carrageenan-induced arthritis.,



- J. Pain. 10 (2009) 336–42. doi:10.1016/j.jpain.2008.10.010.
- [30] M. Izumi, M. Ikeuchi, Q. Ji, T. Tani, Local ASIC3 modulates pain and disease progression in a rat model of osteoarthritis., J. Biomed. Sci. 19 (2012) 77. doi:10.1186/1423-0127-19-77.
- [31] R.C.W. Jones, E. Otsuka, E. Wagstrom, C.S. Jensen, M.P. Price, G.F. Gebhart, Short-term sensitization of colon mechanoreceptors is associated with long-term hypersensitivity to colon distention in the mouse., Gastroenterology. 133 (2007) 184–94. doi:10.1053/j.gastro.2007.04.042.
- [32] C. Reimers, C.-H. Lee, H. Kalbacher, Y. Tian, C.-H. Hung, A. Schmidt, L. Prokop, S. Kauferstein, D. Mebs, C.-C. Chen, S. Grunder, Identification of a cono-{RFamide} from the venom of {Conus} textile that targets {ASIC}3 and enhances muscle pain., Proc. Natl. Acad. Sci. U. S. A. 114 (2017) E3507–E3515. doi:10.1073/pnas.1616232114.
- [33] K.A. Sluka, R. Radhakrishnan, C.J. Benson, J.O. Eshcol, M.P. Price, K. Babinski, K.M. Audette, D.C. Yeomans, S.P. Wilson, ASIC3 in muscle mediates mechanical, but not heat, hyperalgesia associated with muscle inflammation, Pain. 129 (2007) 102–112.
- [34] A.A. Staniland, S.B. McMahon, Mice lacking acid-sensing ion channels (ASIC) 1 or 2, but not ASIC3, show increased pain behaviour in the formalin test., Eur. J. Pain. 13 (2009) 554–63. doi:10.1016/j.ejpain.2008.07.001.
- [35] K. a Sluka, L. a Rasmussen, M.M. Edgar, J.M. O'Donnell, R.Y. Walder, S.J. Kolker, D.L. Boyle, G.S. Firestein, Acid-sensing ion channel 3 deficiency increases inflammation but decreases pain behavior in murine arthritis., Arthritis Rheum. 65 (2013) 1194–202. doi:10.1002/art.37862.
- [36] D.J. Scholz, M.A. Janich, U. Kollisch, R.F. Schulte, J.H. Ardenkjaer-Larsen, A. Frank, A. Haase, M. Schwaiger, M.I. Menzel, Quantified pH imaging with hyperpolarized (13) C-bicarbonate., Magn. Reson. Med. 73 (2015) 2274–2282. doi:10.1002/mrm.25357.
- [37] A.J. Wright, Z.M.A. Husson, D.-E. Hu, G. Callejo, K.M. Brindle, E.S.J. Smith, Increased hyperpolarized [1-(13) C] lactate production in a model of joint inflammation is not accompanied by tissue acidosis as assessed using hyperpolarized (13) C-labelled bicarbonate., NMR Biomed. 31 (2018) e3892. doi:10.1002/nbm.3892.
- [38] F.S.J. Tennant, R.A. Rawson, Guanabenz acetate: a new, long-acting

- alpha-two adrenergic agonist for opioid withdrawal., NIDA Res. Monogr. 49 (1984) 338–343.
- [39] Y. Chen, J.R. Podojil, R.B. Kunjamma, J. Jones, M. Weiner, W. Lin, S.D. Miller, B. Popko, Sephin1, which prolongs the integrated stress response, is a promising therapeutic for multiple sclerosis., Brain. 142 (2019) 344–361. doi:10.1093/brain/awy322.
- [40] N.M. O’Boyle, M. Banck, C.A. James, C. Morley, T. Vandermeersch, G.R. Hutchison, Open {Babel}: {An} open chemical toolbox., J. Cheminform. 3 (2011) 33. doi:10.1186/1758-2946-3-33.
- [41] P.C.D. Hawkins, A.G. Skillman, A. Nicholls, Comparison of shape-matching and docking as virtual screening tools., J. Med. Chem. 50 (2007) 74–82. doi:10.1021/jm0603365.
- [42] E. Pihan, L. Colliandre, J.-F. Guichou, D. Douguet, e-{Drug}3D: 3D structure collections dedicated to drug repurposing and fragment-based drug design., Bioinformatics. 28 (2012) 1540–1541. doi:10.1093/bioinformatics/bts186.
- [43] P.C.D. Hawkins, A.G. Skillman, G.L. Warren, B.A. Ellingson, M.T. Stahl, Conformer generation with {OMEGA}: algorithm and validation using high quality structures from the {Protein} {Databank} and {Cambridge} {Structural} {Database}., J. Chem. Inf. Model. 50 (2010) 572–584. doi:10.1021/ci100031x.
- [44] E. Naylor, A. Arredouani, S.R. Vasudevan, A.M. Lewis, R. Parkesh, A. Mizote, D. Rosen, J.M. Thomas, M. Izumi, A. Ganesan, A. Galione, G.C. Churchill, Identification of a chemical probe for {NAADP} by virtual screening., Nat. Chem. Biol. 5 (2009) 220–226. doi:10.1038/nchembio.150.
- [45] T. Cheeseright, M. Mackey, S. Rose, A. Vinter, Molecular field extrema as descriptors of biological activity: definition and validation., J. Chem. Inf. Model. 46 (2006) 665–676. doi:10.1021/ci050357s.
- [46] E.S.J. Smith, X. Zhang, H. Cadiou, P.A. McNaughton, Proton binding sites involved in the activation of acid-sensing ion channel ASIC2a, Neurosci. Lett. 426 (2007) 12–17.
- [47] I. Dittert, J. Benedikt, L. Vyklický, K. Zimmermann, P.W. Reeh, V. Vlachová, Improved superfusion technique for rapid cooling or heating of cultured cells under patch-clamp conditions, J. Neurosci. Methods. 151 (2006) 178–

185. doi:10.1016/j.jneumeth.2005.07.005.
- [48] T. Rahman, E.S.J. Smith, In silico assessment of interaction of sea anemone toxin APETx2 and acid sensing ion channel 3., *Biochem. Biophys. Res. Commun.* 450 (2014) 384–9. doi:10.1016/j.bbrc.2014.05.130.
- [49] G.M. Morris, R. Huey, W. Lindstrom, M.F. Sanner, R.K. Belew, D.S. Goodsell, A.J. Olson, {AutoDock}4 and {AutoDockTools}4: {Automated} docking with selective receptor flexibility., *J. Comput. Chem.* 30 (2009) 2785–2791. doi:10.1002/jcc.21256.
- [50] Y. Yu, W.-G. Li, Z. Chen, H. Cao, H. Yang, H. Jiang, T.-L. Xu, Atomic level characterization of the nonproton ligand-sensing domain of ASIC3 channels., *J. Biol. Chem.* 286 (2011) 24996–5006. doi:10.1074/jbc.M111.239558.
- [51] I. Das, A. Krzyzosiak, K. Schneider, L. Wrabetz, M. D’Antonio, N. Barry, A. Sigurdardottir, A. Bertolotti, Preventing proteostasis diseases by selective inhibition of a phosphatase regulatory subunit, *Science* (80-. ). 348 (2015) 239–242. doi:10.1126/science.aaa4484.
- [52] L.-N. Schuhmacher, G. Callejo, S. Srivats, E.S.J. Smith, Naked mole-rat acid-sensing ion channel 3 forms nonfunctional homomers, but functional heteromers., *J. Biol. Chem.* 293 (2018) 1756–1766. doi:10.1074/jbc.M117.807859.
- [53] E. Deval, J. Noël, X. Gasull, A. Delaunay, A. Alloui, V. Friend, A. Eschalier, M. Lazdunski, E. Lingueglia, Acid-sensing ion channels in postoperative pain, *J. Neurosci.* 31 (2011) 6059–6066.
- [54] J.-H. Lin, C.-H. Hung, D.-S. Han, S.-T. Chen, C.-H. Lee, W.-Z. Sun, C.-C. Chen, Sensing acidosis: nociception or sngception?, *J. Biomed. Sci.* 25 (2018) 85. doi:10.1186/s12929-018-0486-5.
- [55] M. Mazzuca, C. Heurteaux, A. Alloui, S. Diochot, A. Baron, N. Voilley, N. Blondeau, P. Escoubas, A. Gélou, A. Cupo, A. Zimmer, A.M. Zimmer, A. Eschalier, M. Lazdunski, A tarantula peptide against pain via ASIC1a channels and opioid mechanisms, *Nat. Neurosci.* 10 (2007) 943–945.
- [56] C.-C. Chen, A. Zimmer, W.-H. Sun, J. Hall, M.J. Brownstein, A. Zimmer, A role for ASIC3 in the modulation of high-intensity pain stimuli., *Proc. Natl. Acad. Sci. U. S. A.* 99 (2002) 8992–7. doi:10.1073/pnas.122245999.

- [57] W.-N. Chen, C.-C. Chen, Acid mediates a prolonged antinociception via substance P signaling in acid-induced chronic widespread pain., *Mol. Pain.* 10 (2014) 30. doi:10.1186/1744-8069-10-30.
- [58] J. Karczewski, R.H. Spencer, V.M. Garsky, A. Liang, M.D. Leitzl, M.J. Cato, S.P. Cook, S. Kane, M.O. Urban, Reversal of acid-induced and inflammatory pain by the selective ASIC3 inhibitor, APETx2., *Br. J. Pharmacol.* 161 (2010) 950–60. doi:10.1111/j.1476-5381.2010.00918.x.
- [59] W.-G. Li, Y. Yu, C. Huang, H. Cao, T.-L. Xu, The nonproton ligand sensing domain is required for paradoxical stimulation of ASIC3 channels by amiloride, *J. Biol. Chem.* (2011).
- [60] O. Alijevic, S. Kellenberger, Subtype-specific modulation of acid-sensing ion channel (ASIC) function by 2-guanidine-4-methylquinazoline., *J. Biol. Chem.* 287 (2012) 36059–70. doi:10.1074/jbc.M112.360487.
- [61] Y. Yu, W.-G. Li, Z. Chen, H. Cao, H. Yang, H. Jiang, T.-L. Xu, Atomic level characterization of the nonproton ligand-sensing domain of ASIC3 channels., *J. Biol. Chem.* 286 (2011) 24996–5006. doi:10.1074/jbc.M111.239558.
- [62] B. Holmes, R.N. Brogden, R.C. Heel, T.M. Speight, G.S. Avery, Guanabenz. {A} review of its pharmacodynamic properties and therapeutic efficacy in hypertension., *Drugs.* 26 (1983) 212–229.
- [63] P. Tsaytler, H.P. Harding, D. Ron, A. Bertolotti, Selective inhibition of a regulatory subunit of protein phosphatase 1 restores proteostasis, *Science* (80-. ). 332 (2011) 91–94. doi:10.1126/science.1201396.
- [64] S.W. Way, J.R. Podojil, B.L. Clayton, A. Zaremba, T.L. Collins, R.B. Kunjamma, A.P. Robinson, P. Brugarolas, R.H. Miller, S.D. Miller, B. Popko, Pharmaceutical integrated stress response enhancement protects oligodendrocytes and provides a potential multiple sclerosis therapeutic., *Nat. Commun.* 6 (2015) 6532. doi:10.1038/ncomms7532.
- [65] T. Besson, E. Lingueglia, M. Salinas, Pharmacological modulation of Acid-Sensing Ion Channels 1a and 3 by amiloride and 2-guanidine-4-methylquinazoline (GMQ), *Neuropharmacology.* 125 (2017) 429–440. doi:10.1016/j.neuropharm.2017.08.004.

785 **Table 1**

786

|                                 | <b>I<sub>Peak</sub> (pA/pF)</b> |                        | <b>I<sub>ss</sub> (pA/pF)</b> |                        | <b>I<sub>ss</sub>/I<sub>Peak</sub> (%)</b> |                        | <b>Tau (ms)</b> |                        |
|---------------------------------|---------------------------------|------------------------|-------------------------------|------------------------|--------------------------------------------|------------------------|-----------------|------------------------|
|                                 | <b>Baseline</b>                 | <b>Compound effect</b> | <b>Baseline</b>               | <b>Compound effect</b> | <b>Baseline</b>                            | <b>Compound effect</b> | <b>Baseline</b> | <b>Compound effect</b> |
| <b>APETx2<br/>(n = 10)</b>      | 895.55 ± 160.39                 | 301.01 ± 48.83**       | 5.76 ± 1.17                   | 3.52 ± 0.77*           | 0.92 ± 0.34                                | 1.53 ± 0.54*           | 303.12 ± 14.55  | 243.82 ± 10.06***      |
| <b>GMQ<br/>(n = 8)</b>          | 747.04 ± 107.29                 | 746.18 ± 118.3         | 2.74 ± 0.36                   | 2.9 ± 0.29             | 0.40 ± 0.06                                | 0.47 ± 0.09            | 307.2 ± 16.01   | 307.36 ± 23.19         |
| <b>Tizanidine<br/>(n = 10)</b>  | 806.1 ± 44.39                   | 866.66 ± 68.76         | 8.65 ± 1.19                   | 9.25 ± 1.2             | 1.09 ± 0.14                                | 1.14 ± 0.2             | 311.15 ± 15.68  | 318.14 ± 18.60         |
| <b>Guanfacine<br/>(n = 10)</b>  | 1110.47 ± 90.16                 | 1040.74 ± 119.5        | 7.68 ± 1.27                   | 8.19 ± 1.06            | 0.68 ± 0.09                                | 0.85 ± 0.14            | 318.97 ± 21.26  | 349.97 ± 25.79         |
| <b>Brimonidine<br/>(n = 7)</b>  | 1044.28 ± 102.4                 | 1023.4 ± 144.2         | 9.4 ± 2.1                     | 8.38 ± 1.85            | 1.03 ± 0.3                                 | 0.93 ± 0.25            | 290.49 ± 19.13  | 304.18 ± 31.09         |
| <b>Cycloguanil<br/>(n = 11)</b> | 1035.98 ± 94.33                 | 1055.7 ± 122.5         | 15.32 ± 5.77                  | 15.09 ± 5.3            | 1.27 ± 0.35                                | 1.22 ± 0.28            | 319.34 ± 8.47   | 326.95 ± 10.56         |
| <b>Guanabenz<br/>(n = 11)</b>   | 681.83 ± 78.52                  | 773.52 ± 95.37*        | 9.85 ± 2.32                   | 28.33 ± 6.81*          | 1.56 ± 0.5                                 | 3.92 ± 0.73*           | 319.45 ± 13.85  | 415.38 ± 36.55*        |

## Figures/Table Legends

**Figure 1. Selected FDA-approved drugs after ligand-based in silico screening using GMQ as query molecule.** (A) 2D chemical structure of GMQ and selected FDA-approved drugs (Guanidine or similar moiety is shown in red) and alignment of these drugs with GMQ based on molecular electrostatic field potentials. Forge™ (v 10.4.2; Cresset) was used to align the drug structures with the energy-minimised structure of GMQ. In all cases, the negative, positive and hydrophobic field points are coloured blue, red and gold, respectively (van der Waals isosurfaces are not shown). The sphere size corresponds to possible interaction strength with the cognate probe used for field point calculation. The individual molecular field similarity scores to GMQ (maximum value = 1) are given below right in each panel. (B) Representations of the selected drugs showing similarity in 3D shape and chemical features with GMQ. Drugs were chosen from ligand-based in silico screening using ROCS (OpenEye Scientific Software) that ranked them on the basis of Tanimoto Combo Score. The latter is a sum of Shape Tanimoto and Colour Tanimoto score indicating similarity in 3D shape (maximum value = 1) and chemical features (maximum value = 1). The volume of the query molecule (GMQ) is shown as a dotted area and the chemical similarity aspects are shown in different colours. The figure was generated by ROCS Report (OpenEye).

**Figure 2. Effect of the selected drugs rASIC3 response to pH 6.** (A) Example traces of the effect for the 5 different selected drugs (500 µM) on pH 6-induced rASIC3 activation together with example traces showing the effect of known rASIC3 modulators, APETx2 (1 µM) and GMQ (500 µM). In all cases drugs were applied for 30 s prior to pH 6-induced rASIC3 activation. (B-D) Bar plots showing the effect of the selected drugs, APETx2 and GMQ on transient (peak) (B) and sustained current (C), and inactivation time constant (D) of rASIC3 activation. Values were normalised to baseline pH 6 rASIC3 activation and expressed as means ± SEM (n = 7-11, paired t-test, \*p < 0.05 and \*\*\*p ≤ 0.005 vs baseline pH 6 activation).

**Figure 3. Effect of guanabenz (GBZ) on rASIC3 response to neutral and mild acidic pH.** (A) Example traces of rASIC3 activation at neutral pH elicited by GMQ (1 mM) and GBZ (1 mM). Inset showing magnification of GBZ activation. (B) Bar plot showing the quantification of GMQ- and GBZ-induced rASIC3 activation at neutral pH normalised against ASIC3 pH 6 response. Values were normalised against pH 6 rASIC3 activation. (C) Example traces of the effect of GMQ and GBZ potentiation of the pH 7-induced rASIC3 activation. (D) Bar plot showing the quantification of the potentiation induced by GMQ and GBZ of the pH 7-induced rASIC3 activation. Values were normalised against the baseline pH 7 ASIC3 activation (n = 6-9, paired t-test, \*p ≤ 0.05, \*\*p ≤ 0.01, \*\*\*\*p ≤ 0.001, vs baseline pH 6 activation). (E) The ligand interaction diagrams of GMQ and GBZ were generated using PoseView from their cognate docked complexes (shown in Fig. 4F) with rASIC3 model. (F) GMQ and GBZ were blindly docked to a homology model of rASIC3 dimer (green = chain C and pale blue = chain A) using AutoDock4.2.6. Binding poses of the molecules represent the top-ranked docked pose of individual molecules and are shown in (F) global and (F inset) close-up views. GMQ and GBZ are shown in red and cyan stick representations, respectively.

**Figure 4. Effect of sephin1 on rASIC3 activation.** (A) Comparison of GMQ and sephin1 2D structure and molecular field electrostatics as described in Fig.1 for sephin1 (B) Example trace of effect of sephin1 (500 μM) on pH6-induced rASIC3 activation. (B inset) Magnification of rASIC3 activation induced by sephin1 at neutral pH. (C) Bar plot quantifying sephin1 effect on the transient and sustained normalised current and inactivation time constant of the pH 6-induced rASIC3 activation expressed as a percentage of the pH 6 baseline activation (n = 10, paired t-test; \*p <0.05 vs baseline pH 6 activation). (D) Example trace showing rASIC3 activation by sephin1 at neutral pH. (B inset) Magnification of the current elicited by sephin1 (n = 12). (E) Dose-response effect of increasing concentrations of sephin1 (1 nM–3 mM) applied at neutral pH on rASIC3. Absolute values were normalised using the capacitance of each cell (pA/pF) and expressed as a percentage of the pH 6-induced rASIC3 activation. A non-linear regression using a sigmoidal function was used to determine the EC<sub>50</sub> of sephin1 on rASIC3 (n = 4-12, EC<sub>50</sub> = 0.68 mM).



**Fig. 5. Effect of sephin1 on rASIC3 response to mild acidosis (pH 7) and pH-**

**dependency.** (A) Dose-response effect of increasing concentrations of sephin1 (1 $\mu$ M–1mM) applied at pH 7 on rASIC3. (B) Fitting of normalised values for the transient (peak) and sustained current (pA/pF) obtained in A using a sigmoidal function. (C and D) Bar plot showing the quantification of the data points obtained in A for each sephin1 concentration. Normalised values were expressed as a percentage of the baseline rASIC3 pH 7 activation (n = 8-11, paired t-test, \*\*p  $\leq$  0.01, \*\*\*p  $\leq$  0.005, \*\*\*\*p  $\leq$  0.001, vs baseline pH 7 activation). (E) Ligand interaction diagram of sephin1 generated using PoseView from its cognate docked complex with rASIC3 model. (F) GMQ and sephin1 were blindly docked to a homology model of rASIC3 dimer using AutoDock4.2.6. Binding poses of the molecules represent the top-ranked docked pose of individual molecules and are shown in close-up views. GMQ and sephin1 are shown in red and magenta stick representations, respectively. (G and H) pH-dependent effect of sephin1 on rASIC3. Example traces of rASIC3 response to a pH range from 7.4 to 5 with and without sephin1 (500  $\mu$ M) (n = 7-11) (G and H insets) pH-response curves of rASIC3 activation by different pH extracellular solutions used with (G inset) and without (H inset) sephin1 (500  $\mu$ M). (I) Bar plot showing the quantification of the normalised sustained current (pA/pF) elicited by sephin1 at different pH solutions.

**Table 1. Effect of the selected compounds on rASIC3 current kinetics.**

Comparison of the mean  $\pm$  SEM of the amplitude of the transient ( $I_{peak}$ ) and sustained ( $I_{5s}$ ) current, together with the ratio  $I_{Peak}/I_{5s}$  and the inactivation time constant ( $\tau$ ) between baseline rASIC3 responses and after compound application (Paired t-test, \*p  $\leq$  0.05, \*\*p  $\leq$  0.01, \*\*\*p  $\leq$  0.005).

A

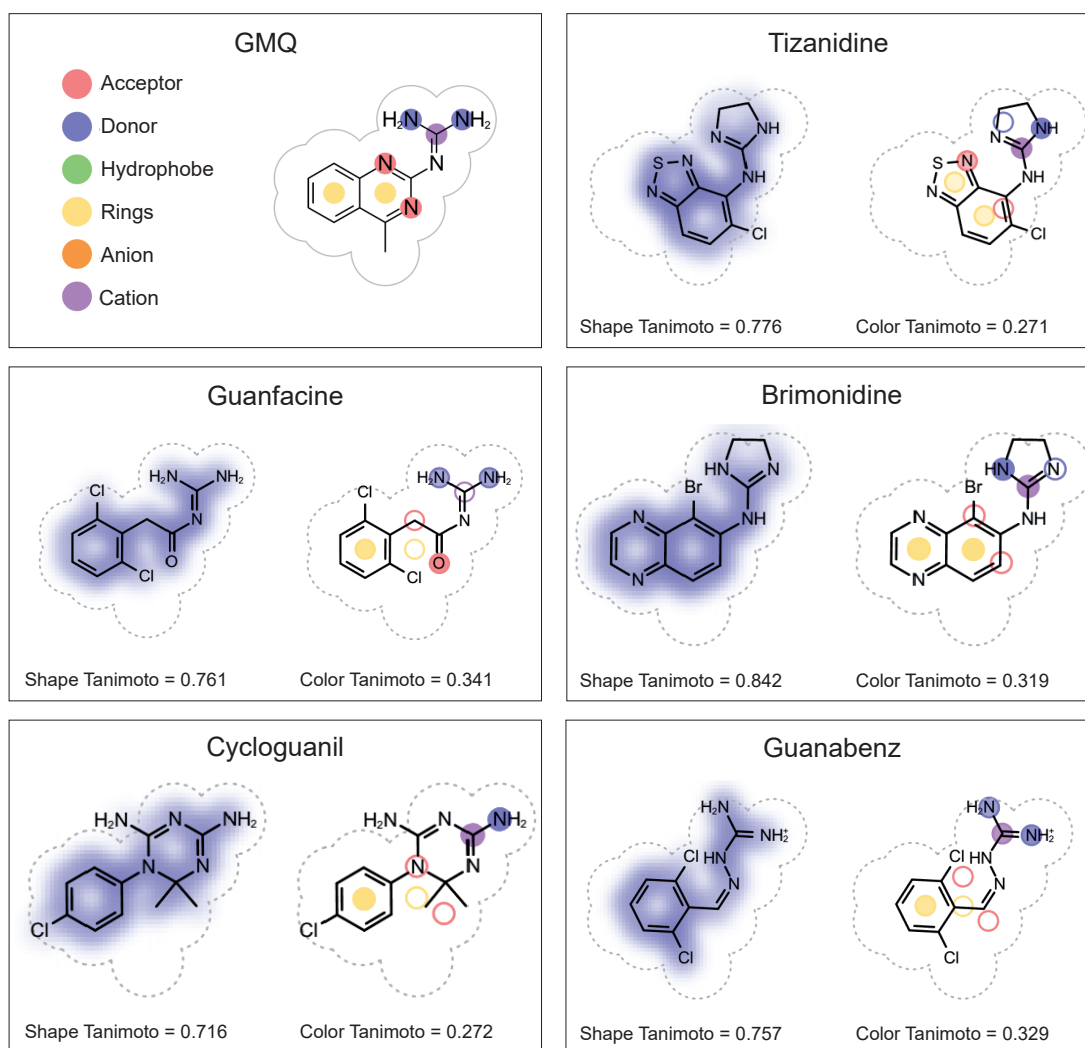

B

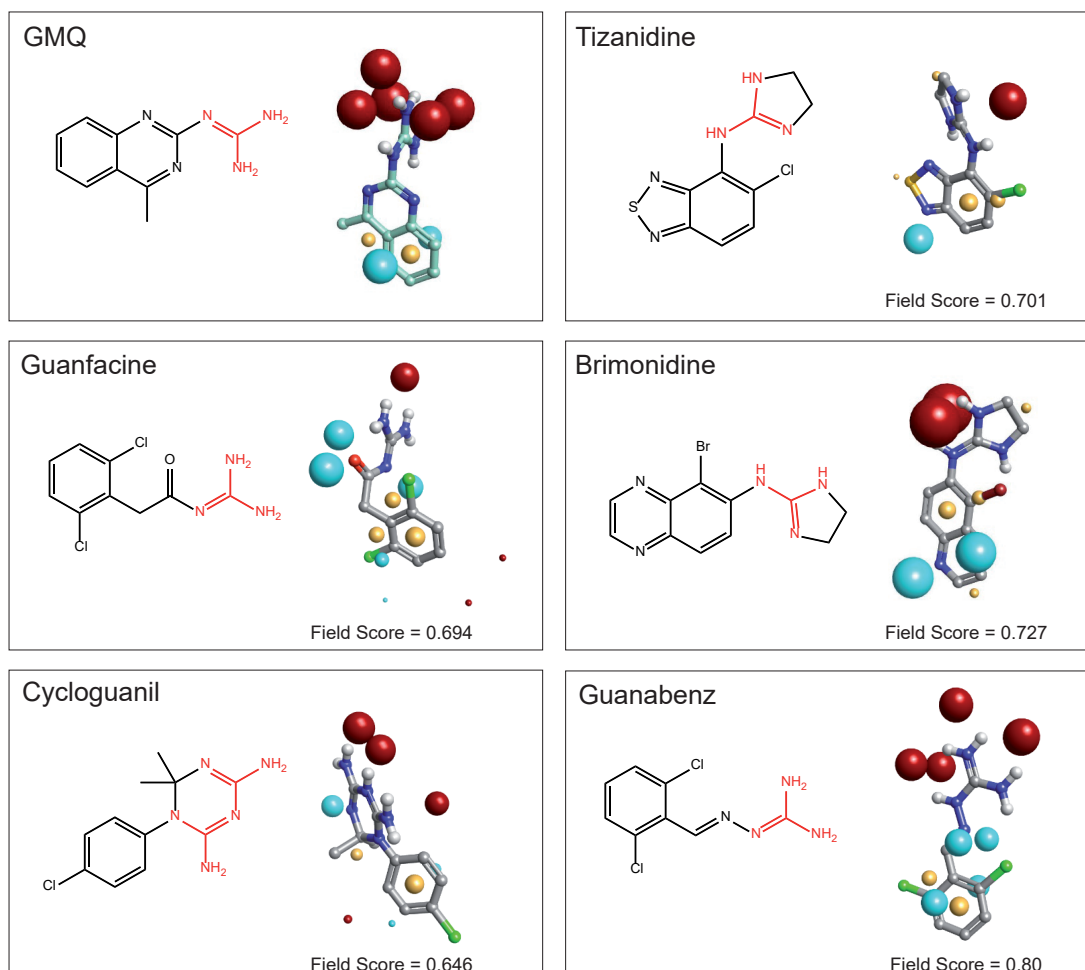

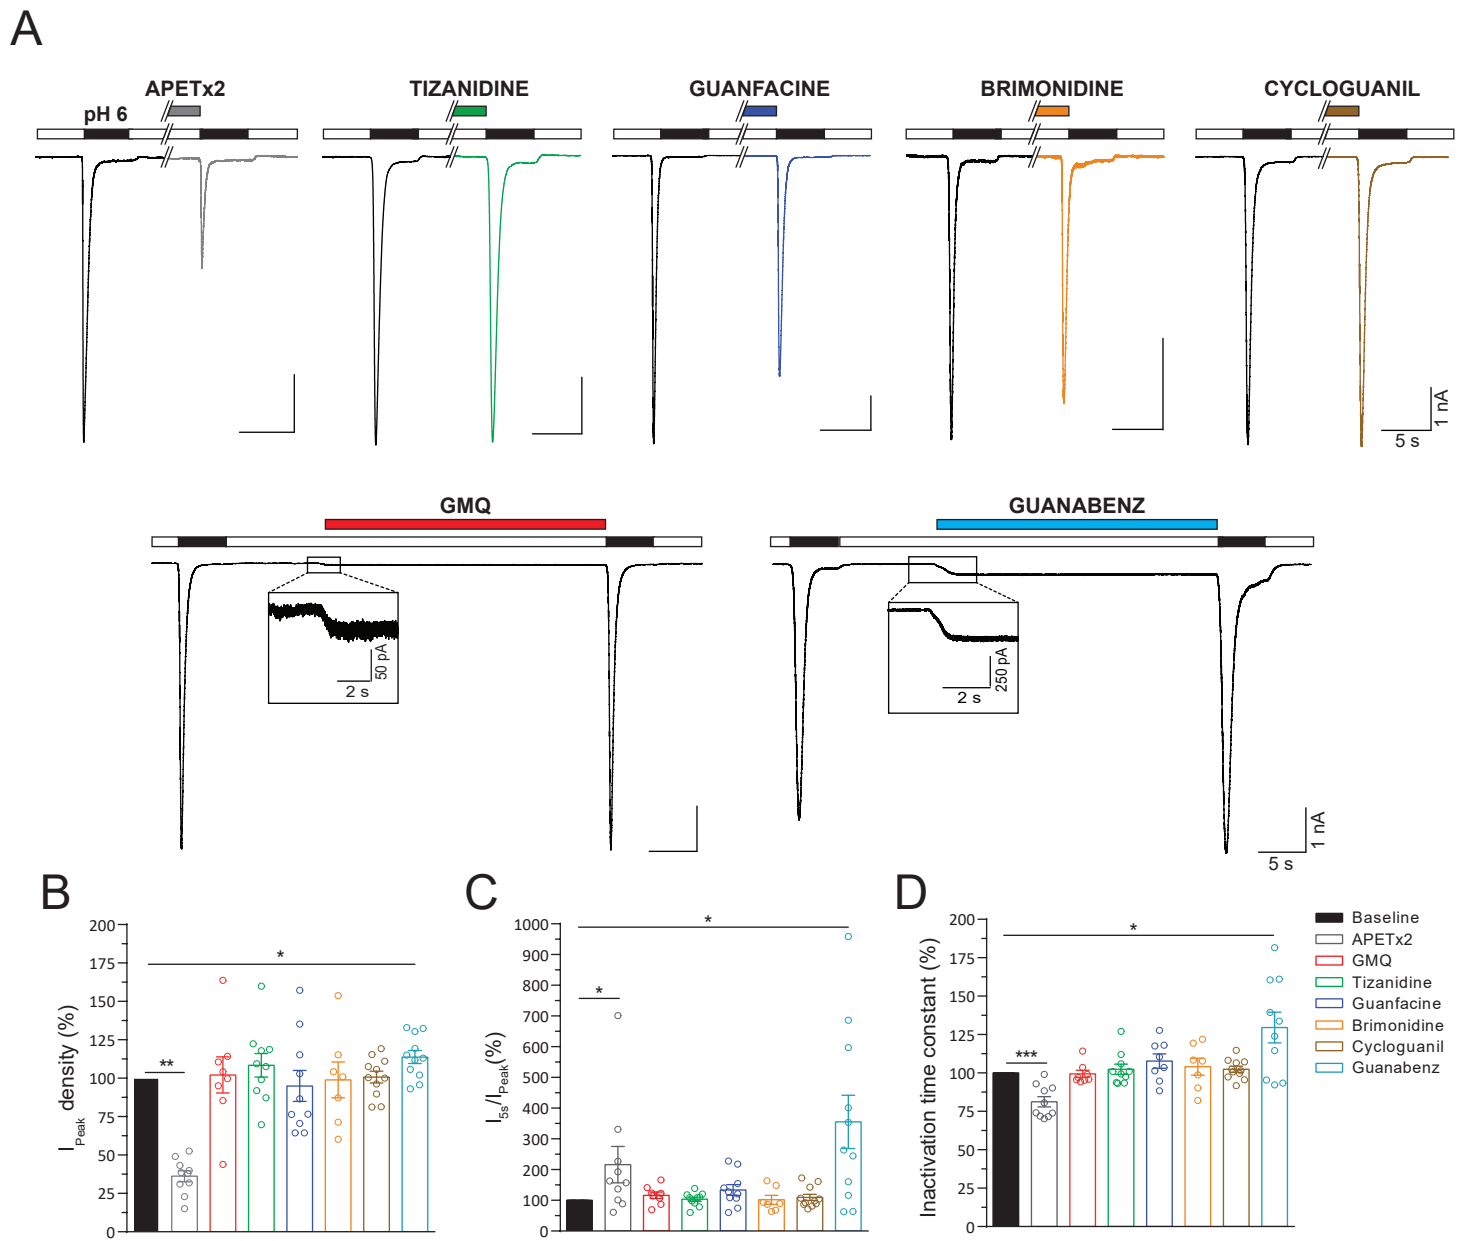

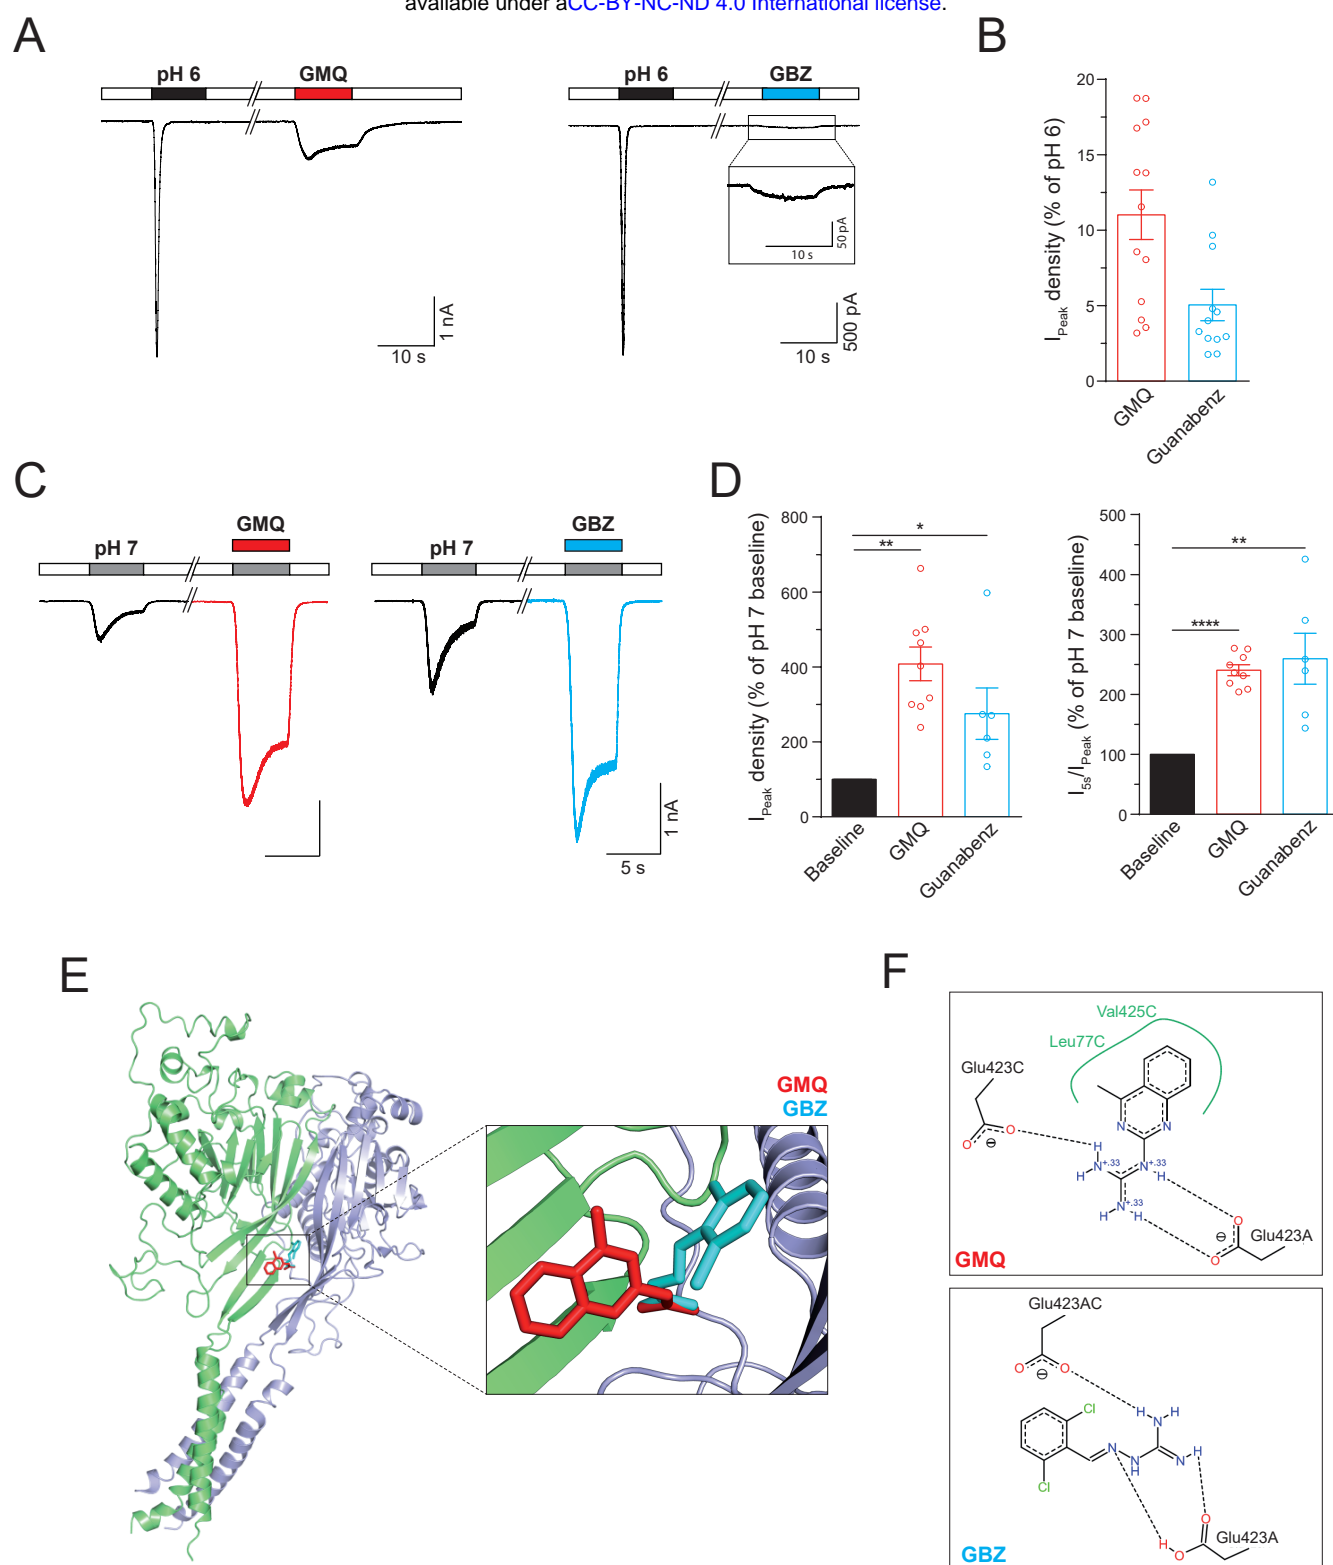

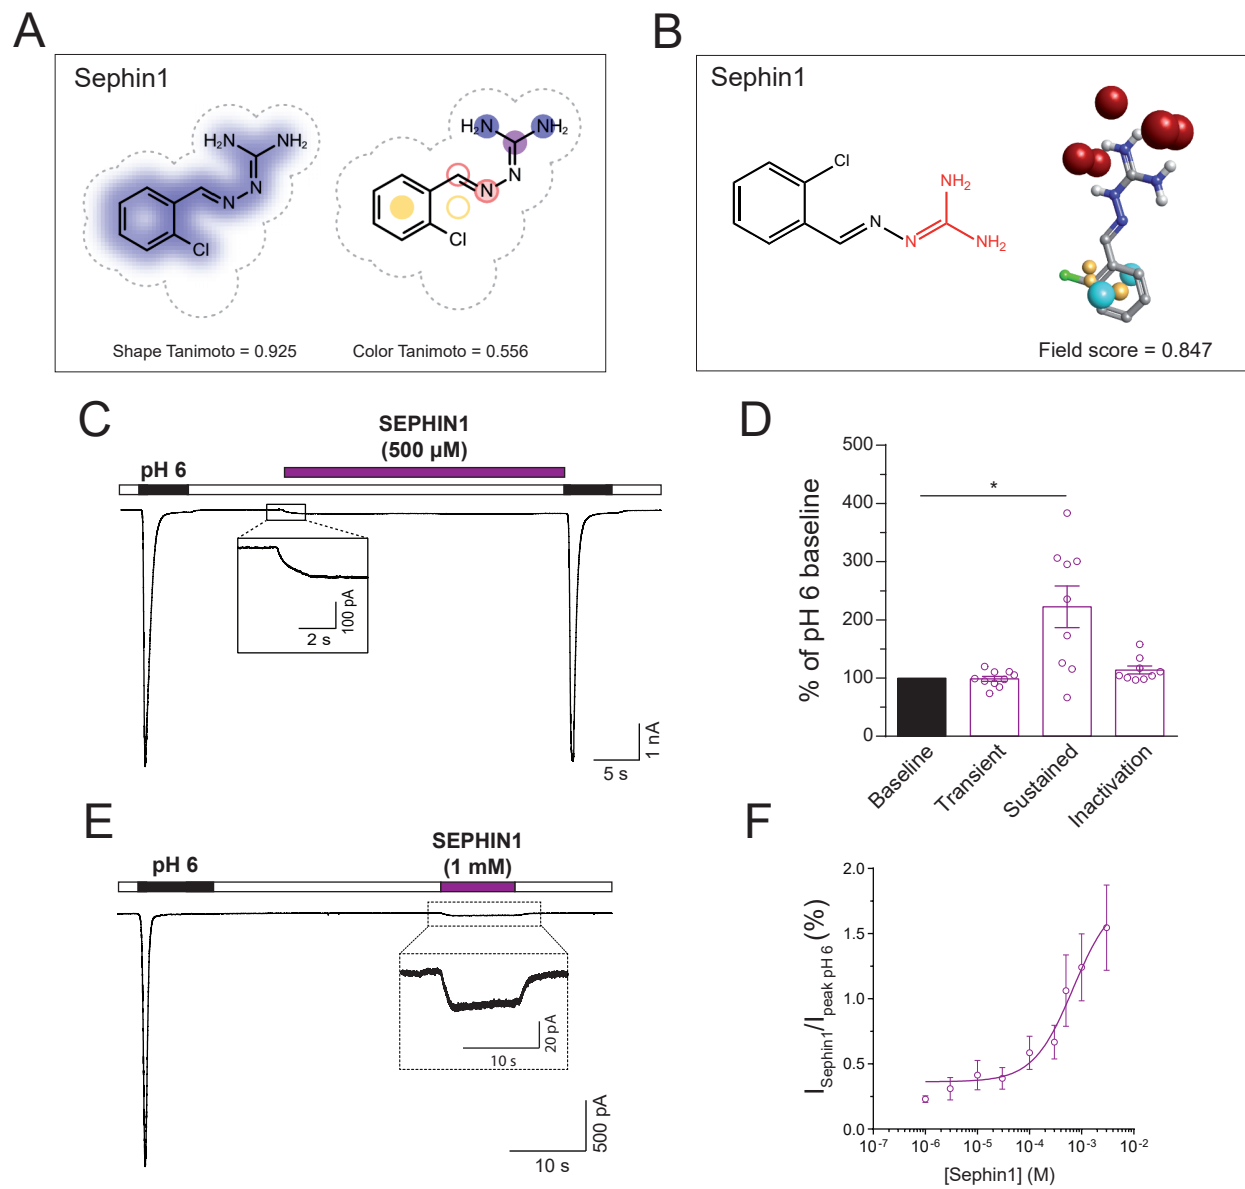

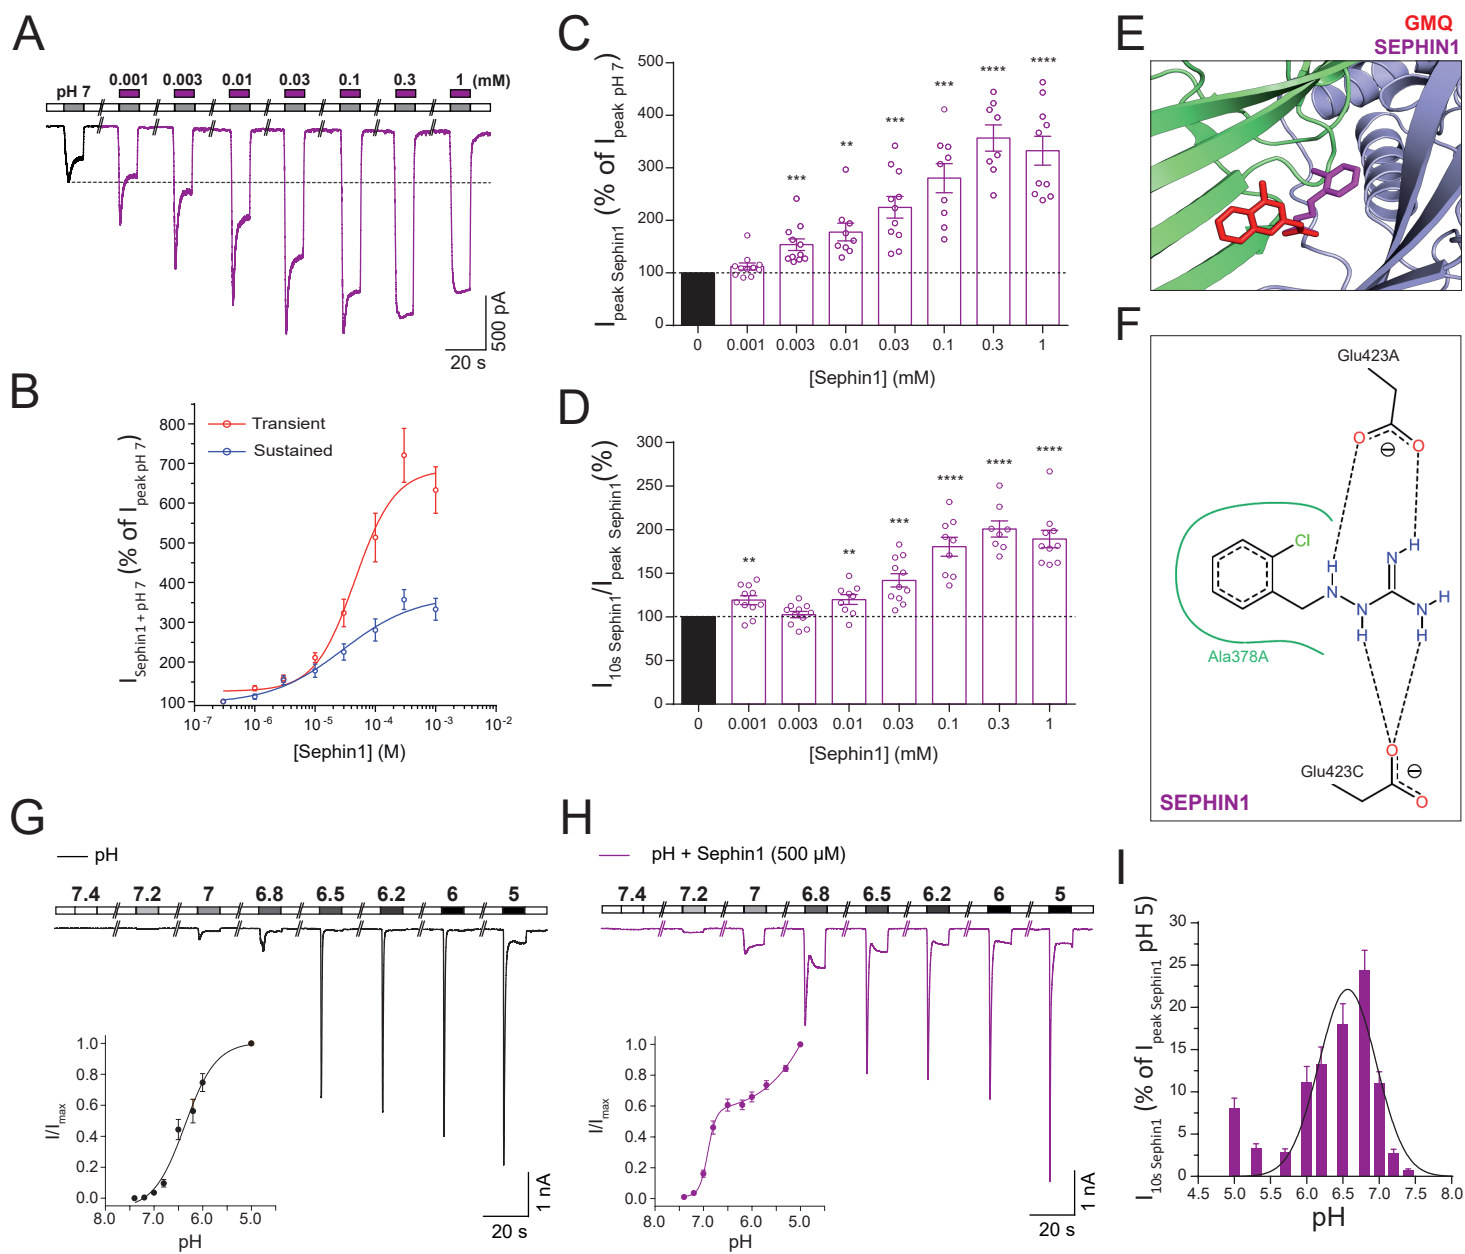

Source: https://www.biorxiv.org/content/10.1101/704445v1.full.pdf
